# Supplementary material for: Association of the X-chromosomal hsa_circ_0140271 with Female Rheumatoid Arthritis
Source: Research Square preprint supplement (doi:10.21203/rs.3.rs-98324/v1), 2020-11-02
Supplement: Supplementary file 1 [file c7d30ca3a0e5a8218eab1db7.xlsx]

## Sheet: Sheet 1
circRNA_ID	circBank_ID	hsa_circbase_ID	Host_gene	Foldchange	difference	logFC	PValue	FDR	RA-F1	RA-F2	RA-M1	RA-M2
chr1_741178_745550_-	hsa_circTCONS_l2_00000968_001	hsa_circ_0002333	not_annotated	2.5034	up	1.32388	0.00201261	0.127653	3.36586	3.32373	0.704926	1.87845
chr1_8601272_8674745_-	hsa_circRERE_019	hsa_circ_0008501	RERE	6.8759	up	2.78154	0.0115841	0.246008	0.210366	0.273183	0.0704926	0
chr1_12335881_12338095_+	hsa_circVPS13D_023	hsa_circ_0009964	VPS13D	-4.1553	down	-2.05495	0.00920002	0.234035	0.12622	0.0455305	0.352463	0.406151
chr1_12422775_12423303_+	hsa_circVPS13D_073	hsa_circ_0110647	VPS13D	21.7776	up	4.44478	0.0213197	0.278865	0.168293	0.091061	0	0
chr1_14057494_14068652_+	hsa_circPRDM2_005	hsa_circ_0005986	PRDM2	1.989	up	0.992008	0.0482869	0.3781	1.34635	1.0472	0.775419	0.45692
chr1_14095612_14109326_+	#N/A	#N/A	PRDM2	-5.4853	down	-2.45557	0.0145771	0.268437	0	0.091061	0.352463	0.203076
chr1_21267983_21268823_-	hsa_circEIF4G3_060	hsa_circ_0010474	EIF4G3	-5.0527	down	-2.33705	0.0411515	0.365366	0	0.091061	0.422956	0.101538
chr1_21295966_21329301_-	hsa_circEIF4G3_047	hsa_circ_0005604	EIF4G3	-5.4666	down	-2.45064	0.0437685	0.365717	0.0420733	0	0.140985	0.152307
chr1_22404921_22413359_+	hsa_circCDC42_002	hsa_circ_0005576	CDC42	2.8155	up	1.49338	0.0218628	0.278865	0.673173	0.500836	0.140985	0.253844
chr1_24140679_24147083_-	hsa_circHMGCL_002	hsa_circ_0003757	HMGCL	6.3143	up	2.65863	0.0182368	0.275262	0.168293	0.273183	0	0.0507689
chr1_24840803_24841057_+	hsa_circRCAN3_001	hsa_circ_0003553	RCAN3	2.5484	up	1.34962	0.00136145	0.122184	4.50184	2.6863	0.986897	1.77691
chr1_29313942_29314417_+	hsa_circEPB41_003	hsa_circ_0011167	EPB41	5.0526	up	2.33702	0.0068841	0.21301	0.631099	0.318714	0.140985	0.0507689
chr1_35819846_35827390_+	hsa_circZMYM4_004	hsa_circ_0113153	ZMYM4	28.6027	up	4.83808	0.00876182	0.229011	0.25244	0.091061	0	0
chr1_36297027_36301594_+	hsa_circAGO4_009	hsa_circ_0113198	AGO4	-49.1197	down	-5.61823	0.00018104	0.0344482	0	0	0.422956	0.203076
chr1_36475075_36499934_+	hsa_circAGO3_009	hsa_circ_0113220	AGO3	-6.529	down	-2.70686	0.0199454	0.275262	0.0420733	0	0.211478	0.152307
chr1_42730785_42744455_-	hsa_circFOXJ3_009	hsa_circ_0113379	FOXJ3	-3.5183	down	-1.81489	0.0244198	0.280002	0.0841466	0.091061	0.28197	0.355382
chr1_52943379_52947595_-	hsa_circZCCHC11_047	hsa_circ_0012545	ZCCHC11	2.9292	up	1.55052	0.0272975	0.297001	0.589026	0.455305	0.0704926	0.253844
chr1_52956403_52975384_-	hsa_circZCCHC11_018	hsa_circ_0113599	ZCCHC11	28.7875	up	4.84737	0.00499501	0.178749	0.210366	0.136592	0	0
chr1_52975267_52992045_-	hsa_circZCCHC11_009	hsa_circ_0113605	ZCCHC11	4.5612	up	2.1894	0.00204163	0.12779	0.925612	0.455305	0.140985	0.152307
chr1_53133070_53134431_+	#N/A	#N/A	not_annotated	8.1273	up	3.02277	0.000314627	0.0479125	0.50488	0.546366	0.0704926	0.0507689
chr1_58992932_59000003_-	hsa_circOMA1_012	hsa_circ_0012720	OMA1	18.497	up	4.20922	0.0395858	0.354633	0.0841466	0.136592	0	0
chr1_62907158_62911100_+	hsa_circUSP1_008	hsa_circ_0113806	USP1	28.6285	up	4.83938	0.00752074	0.220162	0.25244	0.091061	0	0
chr1_62910408_62913182_+	hsa_circUSP1_015	hsa_circ_0113811	USP1	5.7899	up	2.53354	0.0455534	0.365936	0.0841466	0.318714	0	0.0507689
chr1_63294710_63307218_+	hsa_circATG4C_014	hsa_circ_0012828	ATG4C	25.3487	up	4.66384	0.0078459	0.223906	0.168293	0.136592	0	0
chr1_66378927_66384518_+	hsa_circPDE4B_003	hsa_circ_0008433	PDE4B	-13.5556	down	-3.76082	0.000460312	0.064403	0.0420733	0	0.211478	0.507689
chr1_70758070_70781249_-	hsa_circANKRD13C_011	hsa_circ_0000085	ANKRD13C	2.0053	up	1.00381	0.0415531	0.365366	0.967686	1.0472	0.422956	0.558458
chr1_77620133_77635080_-	hsa_circPIGK_009	hsa_circ_0114150	PIGK	-6.0756	down	-2.60303	0.00671631	0.21301	0.0841466	0	0.352463	0.253844
chr1_78167053_78178966_-	hsa_circUSP33_048	hsa_circ_0114171	USP33	-29.4655	down	-4.88096	0.00334689	0.143731	0	0	0.211478	0.152307
chr1_78183551_78191447_-	hsa_circUSP33_030	hsa_circ_0000087	USP33	3.556	up	1.83024	0.0389549	0.352721	0.210366	0.455305	0.0704926	0.101538
chr1_84644859_84680000_+	hsa_circPRKACB_006	hsa_circ_0004083	PRKACB	-3.1147	down	-1.63907	0.030457	0.313744	0.0841466	0.136592	0.352463	0.355382
chr1_85331067_85331821_-	hsa_circLPAR3_003	hsa_circ_0004390	LPAR3	43.3056	up	5.43648	0.00190132	0.125795	0.12622	0.409775	0	0
chr1_89236034_89237562_+	hsa_circPKN2_010	hsa_circ_0002008	PKN2	6.8421	up	2.77445	0.013576	0.264676	0.294513	0.182122	0.0704926	0
chr1_93677657_93698150_+	hsa_circCCDC18_016	hsa_circ_0114519	CCDC18	-5.4601	down	-2.44893	0.0438452	0.365717	0	0.0455305	0.140985	0.152307
chr1_98015115_98060722_-	hsa_circDPYD_028	hsa_circ_0003268	DPYD	-33.2796	down	-5.05656	0.0022815	0.13076	0	0	0.140985	0.253844
chr1_113196219_113202401_+	hsa_circCAPZA1_010	hsa_circ_0000109	CAPZA1	-1.9201	down	-0.941208	0.0488882	0.380002	0.462806	0.637427	0.986897	1.11692
chr1_115005725_115006178_-	hsa_circTRIM33_011	hsa_circ_0013637	TRIM33	18.4838	up	4.20819	0.0337869	0.331144	0.0841466	0.136592	0	0
chr1_115262199_115263338_-	hsa_circCSDE1_023	hsa_circ_0013644	CSDE1	-4.2423	down	-2.08484	0.0360019	0.335806	0.0420733	0.0455305	0.140985	0.253844
chr1_115276352_115280693_-	hsa_circCSDE1_010	hsa_circ_0000115	CSDE1	21.7942	up	4.44587	0.0184172	0.275262	0.168293	0.091061	0	0
chr1_150720252_150730456_-	hsa_circCTSS_003	hsa_circ_0110764	CTSS	-33.923	down	-5.08419	0.0011203	0.115853	0	0	0.211478	0.203076
chr1_150933038_150934634_+	hsa_circSETDB1_031	hsa_circ_0005995	SETDB1	-42.9434	down	-5.42437	0.000274852	0.0450853	0	0	0.211478	0.304613
chr1_150997086_150999803_+	hsa_circPRUNE_005	hsa_circ_0000126	PRUNE	5.6749	up	2.5046	0.0232913	0.280002	0.210366	0.182122	0	0.0507689
chr1_155209406_155209868_-	hsa_circGBA_002	hsa_circ_0014507	GBA	-7.5628	down	-2.91891	0.00807967	0.223906	0	0.0455305	0.211478	0.203076
chr1_155340294_155340774_-	hsa_circASH1L_045	hsa_circ_0007608	ASH1L	9.8742	up	3.30366	0.00158502	0.122184	0.420733	0.273183	0.0704926	0
chr1_155365249_155429689_-	hsa_circASH1L_013	hsa_circ_0014584	ASH1L	-3.7247	down	-1.89712	0.0420351	0.365366	0.0841466	0.0455305	0.140985	0.355382
chr1_155823066_155823597_-	hsa_circGON4L_002	hsa_circ_0000139	GON4L	1.572	up	0.652581	0.0411686	0.365366	3.11342	3.05054	1.69182	2.18306
chr1_159888552_159890327_-	hsa_circTAGLN2_004	hsa_circ_0004617	TAGLN2	-24.4716	down	-4.61304	0.0049011	0.178749	0	0	0.140985	0.152307
chr1_167663335_167667079_+	hsa_circRCSD1_003	hsa_circ_0015105	RCSD1	-5.4601	down	-2.44892	0.0438515	0.365717	0	0.0455305	0.140985	0.152307
chr1_172011148_172038045_+	hsa_circDNM3_012	hsa_circ_0111153	DNM3	39.0051	up	5.28559	0.00190167	0.125795	0.336586	0.136592	0	0
chr1_172520651_172548407_+	hsa_circC1orf9_004	hsa_circ_0015260	SUCO	-7.5137	down	-2.90952	0.0109331	0.244171	0	0.0455305	0.140985	0.253844
chr1_173763912_173768432_-	#N/A	#N/A	not_annotated	18.4709	up	4.20718	0.0295307	0.308064	0.0841466	0.136592	0	0
chr1_179989083_179990144_+	hsa_circCEP350_034	hsa_circ_0111372	CEP350	-5.4666	down	-2.45064	0.0437681	0.365717	0.0420733	0	0.140985	0.152307
chr1_184675776_184681011_-	hsa_circEDEM3_013	hsa_circ_0006507	EDEM3	-5.46	down	-2.44889	0.04396	0.365717	0	0.0455305	0.140985	0.152307
chr1_184853766_184868442_-	hsa_circFAM129A_001	hsa_circ_0008703	FAM129A	-29.0389	down	-4.85991	0.00223046	0.13076	0	0	0.140985	0.203076
chr1_193044949_193046180_+	hsa_circTROVE2_006	hsa_circ_0111566	TROVE2	5.0634	up	2.3401	0.038388	0.350417	0.168293	0.182122	0	0.0507689
chr1_205585605_205593019_-	hsa_circELK4_006	hsa_circ_0000175	ELK4	1.5253	up	0.609056	1.81076e-06	0.000615271	9.97137	9.06057	5.49842	6.80303
chr1_211526580_211527809_+	hsa_circTRAF5_002	hsa_circ_0007234	TRAF5	3.1819	up	1.66988	0.0230025	0.280002	0.37866	0.591897	0.140985	0.152307
chr1_219366471_219414650_+	hsa_circTCONS_00002232_001	hsa_circ_0006963	LYPLAL1	21.8997	up	4.45284	0.0143524	0.268437	0.12622	0.136592	0	0
chr1_235840390_235860572_-	hsa_circLYST_039	hsa_circ_0017077	LYST	-5.4412	down	-2.44392	0.00965448	0.23552	0.0420733	0.0455305	0.28197	0.253844
chr1_235993525_235996967_-	hsa_circLYST_002	hsa_circ_0005899	LYST	-2.3145	down	-1.21068	0.0230869	0.280002	0.420733	0.273183	0.634434	0.964609
chr1_237013643_237016388_+	hsa_circMTR_039	hsa_circ_0017160	MTR	21.8085	up	4.44682	0.0164375	0.274218	0.168293	0.091061	0	0
chr1_243708811_243736350_-	hsa_circAKT3_047	hsa_circ_0000199	AKT3	3.8007	up	1.92625	0.0325975	0.32577	0.462806	0.227653	0	0.152307
chr1_243776972_244006584_-	hsa_circAKT3_009	hsa_circ_0017252	AKT3	3.0767	up	1.6214	0.002269	0.13076	1.09391	1.6391	0.352463	0.507689
chr1_243800912_244006584_-	hsa_circAKT3_008	hsa_circ_0017253	AKT3	5.0688	up	2.34165	0.0049976	0.178749	0.25244	1.27485	0.0704926	0.203076
chr1_243809194_244006584_-	hsa_circAKT3_007	hsa_circ_0017254	AKT3	21.8937	up	4.45244	0.0109682	0.244171	0.12622	0.136592	0	0
chr1_247319707_247323115_-	hsa_circZNF124_008	hsa_circ_0112879	ZNF124	-1.6925	down	-0.759141	0.00676746	0.21301	2.81891	2.0944	4.30005	4.06151
chr10_1102287_1118233_+	hsa_circWDR37_001	hsa_circ_0092600	WDR37	-3.3742	down	-1.75456	0.000174639	0.0344482	0.799393	0.455305	2.04429	2.23383
chr10_1118055_1126416_+	hsa_circWDR37_007	hsa_circ_0017438	WDR37	-2.3276	down	-1.21884	0.0367482	0.340763	0.168293	0.409775	0.563941	0.761533
chr10_1118055_1142186_+	hsa_circWDR37_009	hsa_circ_0000205	WDR37	-2.1776	down	-1.12274	0.0438417	0.365717	0.294513	0.364244	0.986897	0.507689
chr10_11523768_11527910_-	hsa_circUSP6NL_024	hsa_circ_0017683	USP6NL	8.7524	up	3.12969	0.00276318	0.140159	0.294513	0.318714	0	0.0507689
chr10_12039670_12056183_-	hsa_circUPF2_008	hsa_circ_0000213	UPF2	-2.1093	down	-1.07674	0.036561	0.339689	0.631099	0.318714	1.19837	0.863071
chr10_22193450_22209892_-	hsa_circDNAJC1_009	hsa_circ_0004306	DNAJC1	-4.8565	down	-2.27992	0.0179608	0.275262	0.0420733	0.0455305	0.28197	0.203076
chr10_27431315_27434519_-	hsa_circYME1L1_006	hsa_circ_0005633	YME1L1	2.8267	up	1.49914	0.0136921	0.264769	0.589026	0.91061	0.0704926	0.406151
chr10_27458872_27460012_+	hsa_circMASTL_013	hsa_circ_0018037	MASTL	-6.4998	down	-2.70039	0.021843	0.278865	0.0420733	0	0.140985	0.203076
chr10_31661946_31676195_+	hsa_circZEB1_013	hsa_circ_0000228	not_annotated	4.1087	up	2.03866	0.00741696	0.220162	0.589026	0.409775	0.0704926	0.152307
chr10_32740519_32742364_+	hsa_circCCDC7_002	hsa_circ_0093541	CCDC7	5.0424	up	2.33411	0.0447325	0.365717	0.210366	0.136592	0.0704926	0
chr10_32832227_32873232_+	hsa_circCCDC7_022	hsa_circ_0000233	CCDC7	2.6422	up	1.40173	0.000618316	0.0817036	3.45001	2.36759	1.19837	1.01538
chr10_32832227_32912745_+	hsa_circCCDC7_023	hsa_circ_0093558	CCDC7	9.5429	up	3.25443	8.98833e-05	0.0213788	0.589026	0.637427	0	0.101538
chr10_32854485_32912745_+	hsa_circC10orf68_001	hsa_circ_0093561	CCDC7	25.4611	up	4.67022	0.0138703	0.267131	0.12622	0.182122	0	0
chr10_35302626_35320547_-	hsa_circCUL2_029	hsa_circ_0093600	CUL2	6.2918	up	2.65348	0.0151381	0.268437	0.210366	0.227653	0	0.0507689
chr10_49609654_49613024_+	hsa_circMAPK8_006	hsa_circ_0018315	MAPK8	28.6421	up	4.84007	0.00697395	0.21301	0.25244	0.091061	0	0
chr10_51606987_51620382_-	hsa_circTIMM23_003	hsa_circ_0018376	TIMM23	-6.4862	down	-2.69737	0.0226496	0.280002	0	0.0455305	0.140985	0.203076
chr10_61844359_61845011_-	hsa_circANK3_031	hsa_circ_0093804	ANK3	35.7764	up	5.16094	0.00131191	0.122184	0.25244	0.182122	0	0
chr10_69748419_69773943_-	hsa_circHERC4_038	hsa_circ_0018484	HERC4	5.5858	up	2.48177	0.00302574	0.140159	0.673173	0.364244	0.0704926	0.101538
chr10_70140988_70145882_-	#N/A	#N/A	RUFY2	22.0198	up	4.46073	0.0186424	0.275262	0.0841466	0.182122	0	0
chr10_70196767_70229920_-	hsa_circDNA2_011	hsa_circ_0018524	DNA2	-7.6068	down	-2.92728	0.0105047	0.244171	0	0.0455305	0.28197	0.152307
chr10_86177526_86198463_+	hsa_circFAM190B_008	hsa_circ_0003018	CCSER2	-3.4886	down	-1.80266	0.0301508	0.311799	0.0841466	0.091061	0.211478	0.406151
chr10_89624210_89693008_+	hsa_circPTEN_001	hsa_circ_0002232	PTEN	-3.6468	down	-1.86661	0.0160332	0.274218	0.210366	0.0455305	0.352463	0.609227
chr10_90653627_90665417_+	hsa_circSTAMBPL1_002	hsa_circ_0008629	STAMBPL1	25.3422	up	4.66347	0.00889856	0.230523	0.168293	0.136592	0	0
chr10_93754291_93768032_+	hsa_circBTAF1_043	hsa_circ_0008148	BTAF1	-2.8512	down	-1.51157	0.0497134	0.384531	0.0841466	0.136592	0.28197	0.355382
chr10_94653105_94679807_+	hsa_circEXOC6_010	hsa_circ_0019172	EXOC6	5.6785	up	2.5055	0.0427377	0.365717	0.294513	0.091061	0	0.0507689
chr10_95140975_95148911_-	hsa_circMYOF_017	hsa_circ_0005898	MYOF	-4.2484	down	-2.08693	0.0201947	0.275262	0.0420733	0.091061	0.422956	0.203076
chr10_97681772_97687089_+	hsa_circC10orf131_001	hsa_circ_0094631	C10orf131	-5.4596	down	-2.44879	0.0442634	0.365717	0	0.0455305	0.140985	0.152307
chr10_102683731_102685776_+	hsa_circFAM178A_011	hsa_circ_0006654	FAM178A	-3.1931	down	-1.67496	0.0478853	0.377136	0.12622	0.0455305	0.211478	0.355382
chr10_104117795_104119192_+	hsa_circGBF1_009	hsa_circ_0019701	GBF1	-4.2429	down	-2.08504	0.0357723	0.33432	0.0420733	0.0455305	0.140985	0.253844
chr10_121275020_121286936_-	hsa_circRGS10_002	hsa_circ_0005516	RGS10	4.6294	up	2.21082	0.0058096	0.196002	0.757319	0.364244	0.0704926	0.152307
chr10_125798030_125806240_-	hsa_circCHST15_005	hsa_circ_0000264	CHST15	-8.2712	down	-3.04809	1.92018e-07	0.000114179	0.25244	0.0455305	1.40985	1.21845
chr10_126097110_126100769_-	hsa_circOAT_001	hsa_circ_0008898	OAT	-3.7842	down	-1.92	0.0299406	0.311605	0.0420733	0.091061	0.28197	0.253844
chr10_126463243_126478907_-	hsa_circMETTL10_002	hsa_circ_0008969	METTL10	28.5967	up	4.83778	0.00909892	0.232707	0.25244	0.091061	0	0
chr10_126631025_126631876_+	hsa_circZRANB1_005	hsa_circ_0000268	ZRANB1	-2.0728	down	-1.05157	0.0165615	0.274218	0.925612	1.0472	2.46724	1.67537
chr11_14889051_14891176_+	hsa_circPDE3B_027	hsa_circ_0095432	PDE3B	21.8077	up	4.44677	0.0165298	0.274218	0.168293	0.091061	0	0
chr11_17153462_17167489_-	hsa_circPIK3C2A_015	hsa_circ_0021396	PIK3C2A	5.5615	up	2.47546	0.0464235	0.369034	0.294513	0.091061	0.0704926	0
chr11_32948702_32956981_+	hsa_circQSER1_002	hsa_circ_0021570	QSER1	-2.0239	down	-1.01716	0.0355957	0.334172	0.757319	0.500836	1.48035	1.11692
chr11_33307958_33309057_+	hsa_circHIPK3_004	hsa_circ_0000284	HIPK3	-1.6899	down	-0.756925	9.07947e-12	8.6382e-09	9.25612	8.69633	17.0592	13.7076
chr11_46832556_46842819_-	hsa_circCKAP5_003	hsa_circ_0021928	CKAP5	18.4754	up	4.20753	0.0308832	0.316195	0.0841466	0.136592	0	0
chr11_47380394_47397280_-	hsa_circSPI1_003	hsa_circ_0000303	SPI1	-2.4408	down	-1.28738	0.0126411	0.256577	0.37866	0.318714	0.986897	0.761533
chr11_47380394_47397283_-	#N/A	#N/A	SPI1	-2.9441	down	-1.55784	0.0131441	0.260527	0.168293	0.227653	0.634434	0.558458
chr11_57460082_57463515_+	hsa_circZDHHC5_010	hsa_circ_0022168	ZDHHC5	18.4376	up	4.20458	0.0223388	0.280002	0.0841466	0.136592	0	0
chr11_68318588_68331900_+	hsa_circPPP6R3_037	hsa_circ_0007660	PPP6R3	2.115	up	1.08068	0.0457829	0.366007	0.925612	0.682958	0.211478	0.507689
chr11_72695132_72700142_-	hsa_circFCHSD2_008	hsa_circ_0005918	FCHSD2	3.2341	up	1.69336	0.00136542	0.122184	1.05183	1.45698	0.352463	0.406151
chr11_77394754_77404656_-	hsa_circRSF1_029	hsa_circ_0000344	RSF1	2.3129	up	1.20968	0.00940307	0.23552	1.72501	2.91395	0.916404	1.06615
chr11_77666987_77672184_-	hsa_circINTS4_017	hsa_circ_0023746	INTS4	-5.4665	down	-2.45063	0.0436063	0.365717	0.0420733	0	0.140985	0.152307
chr11_85692171_85742653_-	hsa_circPICALM_026	hsa_circ_0023903	PICALM	-4.2434	down	-2.08524	0.0355585	0.334172	0.0420733	0.0455305	0.140985	0.253844
chr11_85707868_85714494_-	hsa_circPICALM_069	hsa_circ_0023919	PICALM	-2.1698	down	-1.11758	0.020447	0.277065	0.420733	0.637427	1.12788	1.16768
chr11_85711685_85742653_-	hsa_circPICALM_021	hsa_circ_0023928	PICALM	-7.6177	down	-2.92936	0.0103355	0.244171	0.0420733	0	0.28197	0.152307
chr11_93523739_93535138_+	hsa_circMED17_009	hsa_circ_0096804	MED17	-6.486	down	-2.69732	0.0226978	0.280002	0	0.0455305	0.140985	0.203076
chr11_108029646_108040770_-	hsa_circNPAT_026	hsa_circ_0094861	NPAT	32.2242	up	5.01007	0.00306423	0.140159	0.25244	0.136592	0	0
chr11_108098321_108100050_+	hsa_circATM_003	hsa_circ_0024193	ATM	2.0736	up	1.05217	0.00376116	0.152382	3.07135	2.64077	1.19837	1.52307
chr11_108129712_108138069_+	hsa_circATM_041	hsa_circ_0094891	ATM	21.9008	up	4.45291	0.0152133	0.268437	0.12622	0.136592	0	0
chr11_108137897_108138069_+	hsa_circATM_042	hsa_circ_0007694	ATM	28.8666	up	4.85133	0.00479027	0.176646	0.168293	0.182122	0	0
chr11_108172374_108175579_+	hsa_circATM_076	hsa_circ_0005583	ATM	2.172	up	1.11903	0.0192182	0.275262	1.17805	1.27485	0.563941	0.558458
chr11_108186549_108188248_+	hsa_circATM_081	hsa_circ_0024230	ATM	18.3738	up	4.19958	0.0274448	0.297001	0.12622	0.091061	0	0
chr11_108199747_108202764_+	hsa_circATM_091	hsa_circ_0024234	ATM	4.6595	up	2.22018	0.00818998	0.223906	0.336586	0.546366	0.140985	0.0507689
chr11_111625222_111626174_-	hsa_circPPP2R1B_008	hsa_circ_0024273	PPP2R1B	18.4413	up	4.20487	0.0229594	0.280002	0.0841466	0.136592	0	0
chr11_118352429_118353210_+	hsa_circMLL_005	hsa_circ_0095113	KMT2A	4.6968	up	2.23169	0.00573533	0.195886	0.37866	0.500836	0.0704926	0.101538
chr11_120345268_120348235_+	hsa_circARHGEF12_073	hsa_circ_0002100	ARHGEF12	5.6802	up	2.50593	0.0244087	0.280002	0.168293	0.227653	0	0.0507689
chr11_121358740_121367758_+	hsa_circSORL1_008	hsa_circ_0095220	SORL1	-28.7762	down	-4.84681	0.00688929	0.21301	0	0	0.140985	0.203076
chr11_129996594_130000061_+	hsa_circAPLP2_006	hsa_circ_0024871	APLP2	-5.4594	down	-2.44876	0.0443833	0.365717	0	0.0455305	0.140985	0.152307
chr11_130130750_130131824_-	hsa_circZBTB44_003	hsa_circ_0002484	ZBTB44	-1.8076	down	-0.854067	0.0115038	0.246008	2.31403	1.82122	4.58202	2.99536
chr11_130130750_130139696_-	#N/A	#N/A	ZBTB44	-5.4665	down	-2.45063	0.0435914	0.365717	0.0420733	0	0.140985	0.152307
chr12_2790819_2791778_-	hsa_circCACNA1C-AS1_001	hsa_circ_0098282	not_annotated	2.8806	up	1.52636	0.0247825	0.281454	0.589026	0.455305	0.211478	0.152307
chr12_12022357_12022903_+	hsa_circETV6_004	hsa_circ_0004123	ETV6	-3.1291	down	-1.64573	0.00950676	0.23552	0.168293	0.182122	0.563941	0.558458
chr12_26774055_26808785_-	#N/A	#N/A	ITPR2	-6.5231	down	-2.70556	0.0200783	0.275262	0	0.0455305	0.211478	0.152307
chr12_28408513_28460682_+	hsa_circCCDC91_005	hsa_circ_0098286	CCDC91	1.8433	up	0.882294	0.0356165	0.334172	2.22988	1.77569	0.986897	1.16768
chr12_28458581_28460682_+	hsa_circCCDC91_012	hsa_circ_0007723	CCDC91	1.9553	up	0.967419	0.0392983	0.352721	1.8933	2.82289	0.775419	1.57384
chr12_28458581_28544344_+	hsa_circCCDC91_015	hsa_circ_0008250	CCDC91	2.2282	up	1.1559	0.0262872	0.291488	1.30427	0.91061	0.352463	0.609227
chr12_28458581_28605587_+	#N/A	#N/A	CCDC91	18.4725	up	4.20731	0.0300011	0.311605	0.0841466	0.136592	0	0
chr12_29812812_29813818_-	hsa_circTMTC1_017	hsa_circ_0025765	not_annotated	-4.785	down	-2.25853	0.0318085	0.321259	0.0841466	0	0.140985	0.304613
chr12_32751430_32764217_+	hsa_circFGD4_012	hsa_circ_0025843	FGD4	-2.3573	down	-1.23712	0.0127489	0.256577	0.589026	1.45698	2.53773	2.2846
chr12_32772631_32786623_+	hsa_circFGD4_031	hsa_circ_0098430	FGD4	-24.4484	down	-4.61167	0.0072141	0.217199	0	0	0.140985	0.152307
chr12_46339031_46357971_-	hsa_circSCAF11_002	hsa_circ_0098621	SCAF11	-8.6204	down	-3.10776	0.00400038	0.158582	0	0.0455305	0.28197	0.203076
chr12_50488219_50490755_+	hsa_circSMARCD1_004	hsa_circ_0006535	SMARCD1	18.446	up	4.20524	0.0237929	0.280002	0.0841466	0.136592	0	0
chr12_50824277_50835426_+	hsa_circLARP4_021	hsa_circ_0003248	LARP4	4.1413	up	2.05009	0.0467789	0.369034	0.37866	0.136592	0	0.101538
chr12_51207792_51208222_+	hsa_circATF1_009	hsa_circ_0026285	ATF1	-6.5287	down	-2.70679	0.0198977	0.275262	0.0420733	0	0.211478	0.152307
chr12_51442816_51451911_+	hsa_circLETMD1_003	hsa_circ_0006668	LETMD1	-24.4951	down	-4.61442	0.00354764	0.149346	0	0	0.140985	0.152307
chr12_56553370_56554104_+	#N/A	#N/A	MYL6	25.3491	up	4.66386	0.00778706	0.223906	0.168293	0.136592	0	0
chr12_65042316_65043332_+	#N/A	#N/A	not_annotated	3.1866	up	1.67203	0.00318706	0.143027	0.925612	0.774019	0.140985	0.355382
chr12_66597490_66622150_+	hsa_circIRAK3_005	hsa_circ_0005505	IRAK3	-2.4768	down	-1.30849	0.000201518	0.0355045	1.8933	1.91228	3.24266	6.09227
chr12_69047891_69050997_+	hsa_circRAP1B_006	hsa_circ_0008853	RAP1B	-3.2609	down	-1.70527	0.0144766	0.268437	0.12622	0.136592	0.422956	0.45692
chr12_72163579_72176438_+	#N/A	#N/A	RAB21	-5.4665	down	-2.45063	0.0435331	0.365717	0.0420733	0	0.140985	0.152307
chr12_80187642_80215970_-	hsa_circPPP1R12A_016	hsa_circ_0099295	PPP1R12A	-3.1913	down	-1.67415	0.0441109	0.365717	0.0841466	0.091061	0.211478	0.355382
chr12_90003713_90029028_-	hsa_circATP2B1_016	hsa_circ_0027707	ATP2B1	-6.4857	down	-2.69726	0.0227463	0.280002	0	0.0455305	0.140985	0.203076
chr12_90049455_90071593_-	hsa_circATP2B1_001	hsa_circ_0099465	ATP2B1	21.8968	up	4.45265	0.0125117	0.256367	0.12622	0.136592	0	0
chr12_97328753_97339627_+	hsa_circNEDD1_012	hsa_circ_0099624	NEDD1	-7.5151	down	-2.9098	0.0108257	0.244171	0	0.0455305	0.140985	0.253844
chr12_103657103_103664086_-	#N/A	#N/A	C12orf42	4.6044	up	2.203	0.000322304	0.0479125	0.841466	0.819549	0.0704926	0.253844
chr12_110463546_110468563_+	hsa_circANKRD13A_017	hsa_circ_0028166	ANKRD13A	-4.8563	down	-2.27986	0.0179063	0.275262	0.0420733	0.0455305	0.28197	0.203076
chr12_111920590_111948386_-	#N/A	#N/A	ATXN2	25.1871	up	4.65461	0.0140521	0.268437	0.210366	0.091061	0	0
chr12_112096539_112117144_-	hsa_circBRAP_013	hsa_circ_0003884	BRAP	-4.2721	down	-2.09494	0.0350942	0.334172	0.0420733	0.0455305	0.28197	0.152307
chr12_112110464_112117144_-	hsa_circBRAP_011	hsa_circ_0028279	BRAP	5.6669	up	2.50257	0.0244673	0.280002	0.210366	0.182122	0.0704926	0
chr12_113354313_113355505_+	#N/A	#N/A	OAS1	-29.3969	down	-4.87759	0.00256147	0.138465	0	0	0.211478	0.152307
chr12_116669865_116675510_-	#N/A	#N/A	MED13L	-5.4589	down	-2.44861	0.0448328	0.365717	0	0.0455305	0.140985	0.152307
chr12_121932381_121972495_-	#N/A	#N/A	KDM2B	-9.627	down	-3.26709	0.00249488	0.136415	0.0420733	0	0.211478	0.304613
chr12_122825299_122826244_-	hsa_circCLIP1_019	hsa_circ_0029069	CLIP1	-1.9894	down	-0.992315	0.0445536	0.365717	0.589026	0.455305	1.26887	0.863071
chr12_122861935_122865105_-	hsa_circCLIP1_001	hsa_circ_0005465	CLIP1	-3.1914	down	-1.67417	0.0440742	0.365717	0.0841466	0.091061	0.211478	0.355382
chr12_124110971_124111703_-	hsa_circEIF2B1_007	hsa_circ_0097743	EIF2B1	18.3593	up	4.19844	0.0341971	0.334036	0.12622	0.091061	0	0
chr12_124904502_124915333_-	hsa_circNCOR2_032	hsa_circ_0029308	NCOR2	-2.6854	down	-1.42512	0.0078893	0.223906	0.37866	0.227653	0.916404	0.761533
chr12_125396368_125397736_-	#N/A	#N/A	UBC	-3.8733	down	-1.95355	0.0417102	0.365366	0.0420733	0.091061	0.422956	0.152307
chr12_129293332_129299615_-	hsa_circSLC15A4_004	hsa_circ_0006689	SLC15A4	-3.124	down	-1.64338	0.0486252	0.379197	0.0841466	0.273183	0.916404	0.253844
chr13_21742126_21742538_-	hsa_circSKA3_005	hsa_circ_0000467	SKA3	-2.6268	down	-1.39329	0.00896427	0.230523	0.336586	0.318714	0.634434	1.06615
chr13_21974511_21999817_-	hsa_circZDHHC20_005	hsa_circ_0029708	ZDHHC20	3.231	up	1.69197	0.0255061	0.286839	0.37866	0.409775	0.0704926	0.152307
chr13_28748408_28794515_+	hsa_circPAN3_008	hsa_circ_0005831	PAN3	-4.9876	down	-2.31835	0.00621523	0.204652	0.0841466	0.0455305	0.28197	0.406151
chr13_41410732_41429951_-	hsa_circLOC100616668_001	hsa_circ_0100445	TPTE2P5	5.7899	up	2.53353	0.045536	0.365936	0.0841466	0.318714	0	0.0507689
chr13_41507605_41508164_-	hsa_circELF1_005	hsa_circ_0100446	ELF1	-2.8777	down	-1.52491	0.0482912	0.3781	0.0841466	0.227653	0.634434	0.304613
chr13_49741379_49749677_+	hsa_circFNDC3A_017	hsa_circ_0004024	FNDC3A	3.1772	up	1.66773	0.0485719	0.379197	0.546953	0.227653	0.140985	0.101538
chr13_51517456_51517530_+	#N/A	#N/A	RNASEH2B	-24.4195	down	-4.60996	0.0133654	0.263814	0	0	0.140985	0.152307
chr13_73347821_73351631_-	hsa_circDIS3_007	hsa_circ_0006762	DIS3	5.0665	up	2.34098	0.0416722	0.365366	0.210366	0.136592	0	0.0507689
chr13_73467921_73491304_+	#N/A	#N/A	PIBF1	18.3981	up	4.20149	0.0206182	0.277065	0.12622	0.091061	0	0
chr13_99890680_99896878_+	hsa_circUBAC2_003	hsa_circ_0030720	UBAC2	1.7807	up	0.83245	0.0114008	0.246008	3.95489	3.36926	1.55084	2.48767
chr13_114817526_114839312_-	hsa_circRASA3_003	hsa_circ_0003750	RASA3	25.6126	up	4.67878	0.0148025	0.268437	0.0841466	0.227653	0	0
chr14_23375403_23380612_-	hsa_circRBM23_005	hsa_circ_0031241	RBM23	1.9798	up	0.985371	0.0448738	0.365717	1.43049	1.0472	0.704926	0.558458
chr14_24679095_24681035_-	hsa_circCHMP4A_005	hsa_circ_0101487	CHMP4A	49.6764	up	5.63449	0.000257807	0.0437995	0.336586	0.273183	0	0
chr14_31814292_31817113_-	hsa_circHEATR5A_056	hsa_circ_0031556	HEATR5A	-24.4789	down	-4.61347	0.00440356	0.167582	0	0	0.140985	0.152307
chr14_50292584_50301167_-	hsa_circNEMF_019	hsa_circ_0101963	NEMF	4.3492	up	2.12074	0.0346146	0.334172	0.37866	0.182122	0.140985	0
chr14_51210102_51211083_-	hsa_circNIN_023	hsa_circ_0102066	NIN	21.8003	up	4.44628	0.0175192	0.275262	0.168293	0.091061	0	0
chr14_56083234_56086030_+	hsa_circKTN1_006	hsa_circ_0102172	KTN1	18.4851	up	4.20829	0.0342762	0.334072	0.0841466	0.136592	0	0
chr14_57696451_57714430_-	hsa_circEXOC5_005	hsa_circ_0032047	EXOC5	-38.9861	down	-5.28489	0.000812214	0.101676	0	0	0.28197	0.203076
chr14_68234420_68236447_-	hsa_circZFYVE26_017	hsa_circ_0000546	ZFYVE26	18.449	up	4.20547	0.0243529	0.280002	0.0841466	0.136592	0	0
chr14_71059596_71064494_-	hsa_circMED6_001	hsa_circ_0032375	MED6	18.4483	up	4.20542	0.0242264	0.280002	0.0841466	0.136592	0	0
chr14_71540261_71543136_+	hsa_circPCNX_096	hsa_circ_0008965	PCNX	25.3471	up	4.66375	0.00807868	0.223906	0.168293	0.136592	0	0
chr14_73614502_73640415_+	hsa_circPSEN1_006	hsa_circ_0002564	PSEN1	-3.925	down	-1.97271	0.000853606	0.104118	0.210366	0.227653	1.19837	0.609227
chr14_86494712_86508177_+	hsa_circTCONS_00022573_001	hsa_circ_0102752	not_annotated	2.0784	up	1.05549	0.0465496	0.369034	0.925612	0.774019	0.211478	0.558458
chr14_91444649_91467503_-	hsa_circRPS6KA5_007	hsa_circ_0032943	RPS6KA5	43.0553	up	5.42812	0.000991951	0.113212	0.168293	0.364244	0	0
chr14_91947919_91952074_-	hsa_circSMEK1_005	hsa_circ_0003045	SMEK1	3.02	up	1.59453	0.0198636	0.275262	0.631099	0.455305	0.140985	0.203076
chr14_92264128_92280169_-	hsa_circTC2N_004	hsa_circ_0102899	TC2N	3.2041	up	1.67992	0.0212123	0.278865	0.420733	0.546366	0.0704926	0.203076
chr14_95590532_95599840_-	hsa_circDICER1_006	hsa_circ_0103003	DICER1	-5.4589	down	-2.44861	0.0448322	0.365717	0	0.0455305	0.140985	0.152307
chr14_96986391_96991728_+	hsa_circPAPOLA_002	hsa_circ_0002120	PAPOLA	6.3144	up	2.65864	0.0182458	0.275262	0.168293	0.273183	0	0.0507689
chr14_97022183_97022750_+	hsa_circPAPOLA_027	hsa_circ_0006717	PAPOLA	3.7999	up	1.92597	0.0458567	0.366007	0.25244	0.227653	0	0.101538
chr14_97026985_97031551_+	hsa_circPAPOLA_032	hsa_circ_0103033	PAPOLA	35.7936	up	5.16163	0.00109538	0.115794	0.25244	0.182122	0	0
chr14_99723807_99724173_-	hsa_circBCL11B_005	hsa_circ_0103051	BCL11B	2.3199	up	1.21407	0.0420897	0.365366	0.883539	0.591897	0.0704926	0.507689
chr14_99924615_99925522_-	hsa_circSETD3_006	hsa_circ_0033149	SETD3	18.4933	up	4.20893	0.0377654	0.348159	0.0841466	0.136592	0	0
chr14_106053890_106173899_-	#N/A	#N/A	ELK2AP	-20.8719	down	-4.38349	7.34967e-07	0.00031784	0.168293	0	3.10168	0.812302
chr15_25638892_25657118_-	hsa_circUBE3A_010	hsa_circ_0103215	UBE3A	5.0482	up	2.33576	0.0483158	0.3781	0.12622	0.227653	0.0704926	0
chr15_32820732_32825569_-	hsa_circTCONS_l2_00008991_001	hsa_circ_0003609	WHAMMP1	-5.038	down	-2.33287	0.00571747	0.195886	0.0420733	0.091061	0.422956	0.304613
chr15_38794512_38798121_-	hsa_circRASGRP1_006	hsa_circ_0034414	RASGRP1	2.9017	up	1.5369	0.0239502	0.280002	0.589026	0.455305	0.140985	0.203076
chr15_41036244_41037457_-	hsa_circFAM82A2_004	hsa_circ_0004942	RMDN3	-3.1621	down	-1.6609	0.0437264	0.365717	0.0420733	0.182122	0.493448	0.253844
chr15_42040834_42042813_+	hsa_circMGA_035	hsa_circ_0034754	MGA	-6.4855	down	-2.69721	0.0227951	0.280002	0	0.0455305	0.140985	0.203076
chr15_45059428_45059793_+	hsa_circTRIM69_002	hsa_circ_0103668	TRIM69	-33.3918	down	-5.06142	0.00166154	0.122184	0	0	0.140985	0.253844
chr15_50763829_50769696_+	hsa_circUSP8_018	hsa_circ_0003879	USP8	-4.2441	down	-2.08544	0.0353339	0.334172	0.0420733	0.0455305	0.140985	0.253844
chr15_51743841_51745838_-	hsa_circDMXL2_035	hsa_circ_0035276	DMXL2	-3.6841	down	-1.8813	0.0159909	0.274218	0.0841466	0.136592	0.563941	0.304613
chr15_51743841_51747425_-	hsa_circDMXL2_034	hsa_circ_0035277	DMXL2	-6.4852	down	-2.69716	0.0228443	0.280002	0	0.0455305	0.140985	0.203076
chr15_52186011_52194233_+	hsa_circTMOD3_014	hsa_circ_0035296	TMOD3	18.4694	up	4.20707	0.0291176	0.306443	0.0841466	0.136592	0	0
chr15_56680669_56687032_+	hsa_circTEX9_006	hsa_circ_0000603	TEX9	5.0607	up	2.33933	0.039026	0.352721	0.168293	0.182122	0.0704926	0
chr15_62312677_62336454_-	hsa_circVPS13C_005	hsa_circ_0000608	VPS13C	-2.4798	down	-1.31021	0.0273974	0.297001	0.294513	0.227653	0.845911	0.507689
chr15_63821212_63855207_+	hsa_circUSP3_004	hsa_circ_0007349	USP3	-4.2439	down	-2.08538	0.0354023	0.334172	0.0420733	0.0455305	0.140985	0.253844
chr15_65471271_65472542_-	hsa_circCLPX_002	hsa_circ_0004374	CLPX	7.0772	up	2.82318	1.69701e-05	0.00448483	0.841466	0.91061	0.140985	0.101538
chr15_65766546_65772737_-	hsa_circDPP8_046	hsa_circ_0104281	DPP8	21.8922	up	4.45235	0.0103767	0.244171	0.12622	0.136592	0	0
chr15_76580186_76585041_-	hsa_circETFA_016	hsa_circ_0000639	ETFA	25.3385	up	4.66326	0.00960597	0.23552	0.168293	0.136592	0	0
chr15_78762873_78764266_+	hsa_circIREB2_009	hsa_circ_0036466	IREB2	-5.4589	down	-2.4486	0.0448829	0.365717	0	0.0455305	0.140985	0.152307
chr15_82443805_82444764_-	hsa_circEFTUD1_018	hsa_circ_0005745	EFTUD1	-4.2853	down	-2.09941	0.0429364	0.365717	0	0.091061	0.28197	0.152307
chr15_83481854_83488240_+	#N/A	#N/A	WHAMM	6.3146	up	2.6587	0.0182918	0.275262	0.168293	0.273183	0	0.0507689
chr15_86118361_86129054_+	hsa_circAKAP13_013	hsa_circ_0104792	AKAP13	-4.8563	down	-2.27985	0.0178938	0.275262	0.0420733	0.0455305	0.28197	0.203076
chr15_86207793_86228104_+	#N/A	#N/A	AKAP13	18.3899	up	4.20084	0.022515	0.280002	0.12622	0.091061	0	0
chr15_94841429_94841959_+	hsa_circMCTP2_001	hsa_circ_0000657	MCTP2	-2.7669	down	-1.46829	0.0282335	0.302492	0.0841466	0.364244	0.634434	0.609227
chr15_94899365_94928754_+	#N/A	#N/A	MCTP2	-2.5464	down	-1.34847	0.0274084	0.297001	0.0841466	0.591897	0.845911	0.863071
chr16_1859238_1859834_-	hsa_circHAGH_010	hsa_circ_0105101	HAGH	3.2392	up	1.69562	0.0285757	0.303426	0.336586	0.455305	0.0704926	0.152307
chr16_11114049_11220003_+	hsa_circCLEC16A_030	hsa_circ_0007846	CLEC16A	-3.656	down	-1.87026	0.0128112	0.256577	0.12622	0.091061	0.493448	0.355382
chr16_11857333_11859541_-	hsa_circZC3H7A_020	hsa_circ_0003769	ZC3H7A	-28.9659	down	-4.85628	0.00291193	0.140159	0	0	0.140985	0.203076
chr16_15973660_15978062_-	hsa_circFOPNL_004	hsa_circ_0003349	FOPNL	4.4719	up	2.16089	0.0227464	0.280002	0.336586	0.227653	0	0.101538
chr16_17448955_17451907_-	hsa_circXYLT1_002	hsa_circ_0105096	XYLT1	-6.4996	down	-2.70036	0.0218838	0.278865	0.0420733	0	0.140985	0.203076
chr16_18851019_18853776_-	hsa_circSMG1_063	hsa_circ_0008216	SMG1	4.0966	up	2.03442	0.0345432	0.334172	0.336586	0.182122	0.0704926	0.0507689
chr16_19627435_19628130_+	hsa_circC16orf62_024	hsa_circ_0005835	C16orf62	3.178	up	1.6681	0.0326779	0.325888	0.420733	0.364244	0.211478	0.0507689
chr16_30510394_30510810_+	hsa_circITGAL_017	hsa_circ_0039053	ITGAL	2.2786	up	1.18818	0.0261759	0.291059	0.715246	0.91061	0.28197	0.406151
chr16_31308834_31309275_+	hsa_circITGAM_003	hsa_circ_0000692	ITGAM	-4.2529	down	-2.08845	0.0211591	0.278865	0	0.273183	0.845911	0.355382
chr16_53288349_53302038_+	hsa_circCHD9_042	hsa_circ_0039363	CHD9	-3.8733	down	-1.95357	0.0417293	0.365366	0.0420733	0.091061	0.422956	0.152307
chr16_68191771_68200918_+	hsa_circNFATC3_013	hsa_circ_0105779	NFATC3	18.4076	up	4.20223	0.0188031	0.275262	0.12622	0.091061	0	0
chr16_80718434_80719026_-	hsa_circCDYL2_001	hsa_circ_0004087	CDYL2	-2.5503	down	-1.35066	0.0124068	0.256199	0.336586	0.774019	1.69182	1.16768
chr17_982569_1003975_-	hsa_circABR_006	hsa_circ_0041189	ABR	-5.4665	down	-2.45061	0.0432906	0.365717	0.0420733	0	0.140985	0.152307
chr17_2297336_2298748_-	hsa_circMNT_002	hsa_circ_0106416	MNT	-2.8416	down	-1.50672	0.0182808	0.275262	0.631099	0.591897	2.74921	0.812302
chr17_4186092_4200109_-	hsa_circUBE2G1_015	hsa_circ_0003239	UBE2G1	-2.1301	down	-1.09091	0.0383053	0.350417	0.336586	0.728488	0.916404	1.31999
chr17_7246697_7247967_+	#N/A	#N/A	ACAP1	-3.8048	down	-1.92781	0.037725	0.348159	0.12622	0	0.28197	0.253844
chr17_18768781_18770647_+	hsa_circPRPSAP2_002	hsa_circ_0042355	PRPSAP2	21.9969	up	4.45923	0.0161726	0.274218	0.0841466	0.182122	0	0
chr17_20107645_20109225_+	hsa_circSPECC1_006	hsa_circ_0000745	SPECC1	-1.5424	down	-0.62517	0.00151742	0.122184	3.91282	3.96115	5.56892	6.49842
chr17_25630392_25637200_+	hsa_circWSB1_010	hsa_circ_0042496	WSB1	-5.9807	down	-2.58031	0.00814029	0.223906	0.0841466	0	0.211478	0.355382
chr17_30500849_30502381_+	hsa_circRHOT1_012	hsa_circ_0043001	RHOT1	-7.2688	down	-2.86171	0.00193	0.125795	0.0841466	0	0.422956	0.304613
chr17_35913216_35914161_-	hsa_circSYNRG_014	hsa_circ_0002455	SYNRG	5.0726	up	2.34272	0.0105936	0.244171	0.336586	0.318714	0.140985	0
chr17_37579579_37580991_-	hsa_circMED1_031	hsa_circ_0043427	MED1	18.4602	up	4.20635	0.0267599	0.294669	0.0841466	0.136592	0	0
chr17_37840849_37842272_-	hsa_circPGAP3_003	hsa_circ_0007990	PGAP3	4.1254	up	2.04455	0.0384524	0.350417	0.168293	0.364244	0.0704926	0.0507689
chr17_38209550_38209910_-	hsa_circMED24_001	hsa_circ_0106807	MED24	22.0416	up	4.46216	0.0217226	0.278865	0.0841466	0.182122	0	0
chr17_44248220_44249598_-	hsa_circ_chr17_00054	hsa_circ_0005455	KANSL1	-2.1279	down	-1.08944	0.0269881	0.296496	0.37866	0.500836	0.845911	1.01538
chr17_45447802_45455269_+	hsa_circC17orf57_013	hsa_circ_0106986	EFCAB13	4.4722	up	2.16098	0.0228602	0.280002	0.336586	0.227653	0	0.101538
chr17_45447802_45473343_+	hsa_circC17orf57_015	hsa_circ_0106987	EFCAB13	25.4452	up	4.66932	0.0110242	0.244171	0.12622	0.182122	0	0
chr17_45479497_45492285_+	hsa_circC17orf57_017	hsa_circ_0000778	EFCAB13	2.1661	up	1.11508	0.0332519	0.328173	0.757319	0.91061	0.28197	0.45692
chr17_46187328_46195399_-	#N/A	#N/A	not_annotated	5.0666	up	2.341	0.0417377	0.365366	0.210366	0.136592	0	0.0507689
chr17_49294694_49302570_-	hsa_circMBTD1_003	hsa_circ_0003871	MBTD1	-3.6417	down	-1.8646	0.0144274	0.268437	0.168293	0.0455305	0.422956	0.406151
chr17_57987922_57992064_+	hsa_circRPS6KB1_002	hsa_circ_0107290	RPS6KB1	36.3188	up	5.18264	0.0041588	0.162159	0.0841466	0.364244	0	0
chr17_62486940_62488484_-	hsa_circPOLG2_005	hsa_circ_0107432	POLG2	7.5261	up	2.9119	0.00679994	0.21301	0.25244	0.273183	0	0.0507689
chr17_74763467_74772623_+	hsa_circMFSD11_019	hsa_circ_0045842	MFSD11	18.4003	up	4.20166	0.0201733	0.275262	0.12622	0.091061	0	0
chr17_79571573_79575848_-	hsa_circNPLOC4_035	hsa_circ_0000814	NPLOC4	18.433	up	4.20422	0.0216216	0.278865	0.0841466	0.136592	0	0
chr17_80521229_80526077_+	hsa_circFOXK2_007	hsa_circ_0000816	FOXK2	-2.4193	down	-1.2746	0.0343663	0.334072	0.462806	0.182122	0.422956	1.11692
chr17_81042813_81043199_+	#N/A	#N/A	METRNL	-3.5224	down	-1.81655	3.1161e-08	2.47055e-05	1.68293	2.73183	10.5034	5.17843
chr17_81042813_81050971_+	#N/A	#N/A	METRNL	-50.4285	down	-5.65617	0.000424035	0.0611253	0	0	0.493448	0.152307
chr18_2884961_2892484_+	hsa_circEMILIN2_002	hsa_circ_0046747	EMILIN2	-7.2178	down	-2.85157	0.00177227	0.122184	0.0841466	0	0.352463	0.355382
chr18_2890558_2892484_+	hsa_circEMILIN2_003	hsa_circ_0004658	EMILIN2	-2.8712	down	-1.52167	0.000151926	0.0328506	1.17805	0.774019	3.03118	2.63998
chr18_9583114_9595100_-	hsa_circPPP4R1_023	hsa_circ_0009022	PPP4R1	-2.3778	down	-1.24961	0.00664869	0.21301	0.546953	0.591897	1.40985	1.31999
chr18_12814201_12859253_-	#N/A	#N/A	PTPN2	-29.3823	down	-4.87687	0.00242927	0.136415	0	0	0.211478	0.152307
chr18_12999419_13019205_+	hsa_circCEP192_006	hsa_circ_0000831	CEP192	-1.7931	down	-0.842434	0.0398583	0.356403	1.00976	1.00167	1.9033	1.72614
chr18_21644103_21649235_+	hsa_circTTC39C_005	hsa_circ_0000839	TTC39C	2.9898	up	1.58003	0.0014633	0.122184	1.51464	1.6391	0.352463	0.659995
chr18_29450334_29451083_-	hsa_circTRAPPC8_046	hsa_circ_0005427	TRAPPC8	-5.4665	down	-2.45061	0.0431723	0.365717	0.0420733	0	0.140985	0.152307
chr18_42281139_42283072_+	hsa_circSETBP1_005	hsa_circ_0005942	SETBP1	-4.2563	down	-2.08961	0.0314515	0.31969	0.0420733	0.0455305	0.211478	0.203076
chr18_42529845_42533305_+	hsa_circSETBP1_021	hsa_circ_0108457	SETBP1	-4.2439	down	-2.08538	0.0354053	0.334172	0.0420733	0.0455305	0.140985	0.253844
chr18_48422178_48439320_+	hsa_circME2_002	hsa_circ_0047690	ME2	22.0144	up	4.46037	0.0179911	0.275262	0.0841466	0.182122	0	0
chr18_59739905_59770135_-	#N/A	#N/A	PIGN	-38.4584	down	-5.26523	0.000500883	0.0680771	0	0	0.211478	0.253844
chr18_59764913_59770135_-	#N/A	#N/A	PIGN	-80.2231	down	-6.32595	1.26434e-06	0.000462651	0	0	0.422956	0.558458
chr18_59949494_59954700_+	hsa_circKIAA1468_016	hsa_circ_0108760	KIAA1468	6.2918	up	2.65348	0.0166732	0.274218	0.25244	0.182122	0	0.0507689
chr18_66564455_66564919_+	hsa_circCCDC102B_004	hsa_circ_0007342	CCDC102B	29.1583	up	4.86584	0.00858507	0.225631	0.0841466	0.273183	0	0
chr18_72997402_73000603_+	hsa_circTSHZ1_001	hsa_circ_0002895	TSHZ1	-2.6834	down	-1.42408	0.0412049	0.365366	0.168293	0.182122	0.634434	0.355382
chr18_74778253_74817242_-	hsa_circMBP_001	hsa_circ_0108891	MBP	-7.6069	down	-2.92731	0.0105141	0.244171	0	0.0455305	0.28197	0.152307
chr18_76886266_76914555_+	hsa_circATP9B_017	hsa_circ_0007134	ATP9B	-4.3049	down	-2.10599	0.0419448	0.365366	0.0841466	0	0.28197	0.152307
chr18_77170402_77171501_+	hsa_circNFATC1_001	hsa_circ_0048023	NFATC1	-2.4491	down	-1.29224	0.0171857	0.275262	0.336586	0.318714	0.563941	1.01538
chr19_5039846_5047680_+	hsa_circKDM4B_014	hsa_circ_0004720	KDM4B	-9.444	down	-3.23939	0.00493749	0.178749	0	0.0455305	0.140985	0.355382
chr19_8601135_8604912_-	hsa_circMYO1F_009	hsa_circ_0000886	MYO1F	-3.5857	down	-1.84226	0.00425505	0.164563	0.12622	0.227653	0.563941	0.710764
chr19_8616623_8618321_-	#N/A	#N/A	MYO1F	-2.4339	down	-1.28324	0.0215678	0.278865	0.210366	0.409775	0.563941	0.91384
chr19_14513408_14515374_+	hsa_circCD97_003	hsa_circ_0004853	CD97	-2.7874	down	-1.4789	0.0349613	0.334172	0.0841466	0.273183	0.493448	0.507689
chr19_14568842_14569187_+	hsa_circPKN1_005	hsa_circ_0008950	PKN1	7.5199	up	2.91071	0.00727421	0.217632	0.294513	0.227653	0	0.0507689
chr19_14815865_14817585_+	hsa_circZNF333_005	hsa_circ_0109164	ZNF333	18.4076	up	4.20223	0.0188031	0.275262	0.12622	0.091061	0	0
chr19_19603114_19603521_+	hsa_circGATAD2A_008	hsa_circ_0006804	GATAD2A	2.8685	up	1.52031	0.00285985	0.140159	1.09391	1.13826	0.422956	0.355382
chr19_36940132_36940903_-	hsa_circZNF566_002	hsa_circ_0109499	ZNF566	21.9009	up	4.45292	0.0152925	0.268437	0.12622	0.136592	0	0
chr19_37690301_37698156_-	hsa_circZNF585B_004	hsa_circ_0109541	ZNF585B	25.3418	up	4.66345	0.00896503	0.230523	0.168293	0.136592	0	0
chr19_45781180_45781873_+	hsa_circMARK4_021	hsa_circ_0000941	MARK4	35.8348	up	5.16329	0.00174793	0.122184	0.210366	0.227653	0	0
chr19_50285013_50285981_+	hsa_circAP2A1_001	hsa_circ_0003395	AP2A1	-28.9623	down	-4.8561	0.00295296	0.140159	0	0	0.140985	0.203076
chr2_9028147_9098771_-	hsa_circMBOAT2_016	hsa_circ_0008847	MBOAT2	32.2253	up	5.01012	0.00304054	0.140159	0.25244	0.136592	0	0
chr2_9552397_9558861_-	hsa_circITGB1BP1_004	hsa_circ_0121196	ITGB1BP1	18.4515	up	4.20566	0.0248499	0.281454	0.0841466	0.136592	0	0
chr2_10931920_10933328_-	hsa_circPDIA6_002	hsa_circ_0007250	PDIA6	18.3983	up	4.2015	0.020587	0.277065	0.12622	0.091061	0	0
chr2_19100478_19125164_+	hsa_circTCONS_00003590_003	hsa_circ_0007794	not_annotated	18.4525	up	4.20574	0.0250623	0.283186	0.0841466	0.136592	0	0
chr2_20518297_20532824_-	hsa_circPUM2_004	hsa_circ_0004642	PUM2	22.0226	up	4.46091	0.018985	0.275262	0.0841466	0.182122	0	0
chr2_24098698_24108699_-	hsa_circATAD2B_017	hsa_circ_0052962	ATAD2B	35.8348	up	5.16329	0.00175045	0.122184	0.210366	0.227653	0	0
chr2_24205765_24207701_+	hsa_circUBXN2A_012	hsa_circ_0003947	UBXN2A	6.256	up	2.64524	0.0389087	0.352721	0.0841466	0.364244	0.0704926	0
chr2_24493539_24494810_-	hsa_circITSN2_024	hsa_circ_0119543	ITSN2	-24.4903	down	-4.61414	0.00377119	0.152382	0	0	0.140985	0.152307
chr2_24733837_24807429_+	hsa_circNCOA1_004	hsa_circ_0006934	NCOA1	3.9974	up	1.99908	0.0142981	0.268437	0.336586	0.409775	0.0704926	0.101538
chr2_30748452_30791042_+	hsa_circLCLAT1_005	hsa_circ_0053375	LCLAT1	35.8328	up	5.16321	0.00158267	0.122184	0.210366	0.227653	0	0
chr2_40655612_40657441_-	hsa_circSLC8A1_008	hsa_circ_0005232	SLC8A1	-3.1609	down	-1.66032	0.0122633	0.254744	0.210366	0.227653	1.05739	0.406151
chr2_40655612_40657444_-	hsa_circSLC8A1_005	hsa_circ_0000994	SLC8A1	-3.7321	down	-1.89999	5.45597e-17	1.2977e-13	2.3561	1.73016	8.31813	7.10764
chr2_45773455_45780869_-	hsa_circSRBD1_020	hsa_circ_0002200	SRBD1	18.4364	up	4.20448	0.0221402	0.280002	0.0841466	0.136592	0	0
chr2_58449076_58459247_-	hsa_circFANCL_003	hsa_circ_0001009	FANCL	3.8152	up	1.93175	0.00158572	0.122184	0.673173	1.13826	0.0704926	0.355382
chr2_61340904_61345251_+	hsa_circKIAA1841_039	hsa_circ_0001014	KIAA1841	-6.0762	down	-2.60317	0.00677002	0.21301	0.0841466	0	0.352463	0.253844
chr2_61570949_61577828_-	hsa_circUSP34_044	hsa_circ_0120633	USP34	6.8416	up	2.77433	0.0136443	0.264769	0.294513	0.182122	0.0704926	0
chr2_61722589_61727029_-	hsa_circXPO1_053	hsa_circ_0120676	XPO1	-3.1981	down	-1.67719	0.0465365	0.369034	0.12622	0.136592	0.704926	0.203076
chr2_69583627_69590802_-	hsa_circGFPT1_018	hsa_circ_0055061	GFPT1	-29.3397	down	-4.87478	0.00209757	0.127925	0	0	0.211478	0.152307
chr2_70387756_70409129_-	hsa_circC2orf42_008	hsa_circ_0004975	C2orf42	-5.3364	down	-2.41586	0.017312	0.275262	0.0420733	0.0455305	0.140985	0.355382
chr2_71753349_71766369_+	#N/A	#N/A	DYSF	-4.9273	down	-2.3008	0.0292632	0.307193	0	0.091061	0.352463	0.152307
chr2_89082250_89092011_+	#N/A	#N/A	ANKRD36BP2	3.0308	up	1.59971	0.0242443	0.280002	0.420733	0.500836	0.140985	0.152307
chr2_99720429_99734222_-	hsa_circTSGA10_004	hsa_circ_0121292	TSGA10	21.8927	up	4.45238	0.0105514	0.244171	0.12622	0.136592	0	0
chr2_99721821_99734222_-	hsa_circTSGA10_003	hsa_circ_0121294	TSGA10	4.9179	up	2.29805	0.0309083	0.316195	0.50488	0.136592	0.140985	0
chr2_101898320_101911643_-	hsa_circRNF149_005	hsa_circ_0055904	RNF149	-5.01	down	-2.32481	0.00303072	0.140159	0.12622	0.136592	1.05739	0.355382
chr2_107446521_107450602_-	hsa_circST6GAL2_009	hsa_circ_0055953	ST6GAL2	4.1487	up	2.05266	0.0316976	0.321259	0.210366	0.318714	0	0.101538
chr2_109288780_109289485_+	hsa_circLIMS1_005	hsa_circ_0008348	LIMS1	6.2604	up	2.64624	0.0173408	0.275262	0.25244	0.182122	0.0704926	0
chr2_112702536_112705144_+	hsa_circMERTK_005	hsa_circ_0056121	MERTK	-6.5231	down	-2.70556	0.0200852	0.275262	0	0.0455305	0.211478	0.152307
chr2_120684173_120692534_+	hsa_circPTPN4_046	hsa_circ_0056247	PTPN4	6.2918	up	2.65348	0.0151375	0.268437	0.210366	0.227653	0	0.0507689
chr2_121043449_121047333_+	hsa_circRALB_002	hsa_circ_0007186	RALB	-9.6271	down	-3.2671	0.00249074	0.136415	0.0420733	0	0.211478	0.304613
chr2_128525762_128528578_-	hsa_circWDR33_001	hsa_circ_0056362	WDR33	5.6748	up	2.50457	0.0232488	0.280002	0.210366	0.182122	0	0.0507689
chr2_128922303_128928858_+	hsa_circUGGT1_054	hsa_circ_0008298	UGGT1	3.7999	up	1.92597	0.0458538	0.366007	0.25244	0.227653	0	0.101538
chr2_136505836_136528305_+	hsa_circUBXN4_004	hsa_circ_0056589	UBXN4	-5.4588	down	-2.44859	0.0448977	0.365717	0	0.0455305	0.140985	0.152307
chr2_160193972_160252345_-	hsa_circBAZ2B_026	hsa_circ_0117770	BAZ2B	-4.9875	down	-2.31832	0.00623809	0.204652	0.0841466	0.0455305	0.28197	0.406151
chr2_162036124_162081257_+	hsa_circTANK_002	hsa_circ_0117803	TANK	-29.538	down	-4.8845	0.00462413	0.174579	0	0	0.211478	0.152307
chr2_170460151_170465268_+	hsa_circPPIG_001	hsa_circ_0118003	PPIG	-5.4586	down	-2.44853	0.0450927	0.365936	0	0.0455305	0.140985	0.152307
chr2_171884848_171917666_-	#N/A	#N/A	TLK1	5.6786	up	2.50553	0.0428862	0.365717	0.294513	0.091061	0	0.0507689
chr2_172182350_172187208_-	#N/A	#N/A	METTL8	21.8946	up	4.4525	0.011392	0.246008	0.12622	0.136592	0	0
chr2_172305190_172333460_+	hsa_circDCAF17_013	hsa_circ_0057051	DCAF17	25.4236	up	4.66809	0.00849373	0.225063	0.12622	0.182122	0	0
chr2_172782046_172809519_+	hsa_circHAT1_002	hsa_circ_0008032	HAT1	-2.6172	down	-1.38803	0.0467489	0.369034	0.12622	0.182122	0.352463	0.45692
chr2_174819600_174820960_-	hsa_circSP3_001	hsa_circ_0002642	SP3	-2.3796	down	-1.25074	0.0143713	0.268437	0.462806	0.728488	1.76232	1.11692
chr2_175976295_176015886_-	#N/A	#N/A	ATF2	-6.5286	down	-2.70677	0.0198808	0.275262	0.0420733	0	0.211478	0.152307
chr2_179400458_179407088_+	hsa_circLOC100506866_005	hsa_circ_0004305	TTN-AS1	-5.3804	down	-2.42771	0.00386354	0.154444	0.0841466	0.0455305	0.28197	0.45692
chr2_191523883_191537878_+	hsa_circNAB1_009	hsa_circ_0002024	NAB1	-2.1748	down	-1.12085	0.0275337	0.297001	0.462806	1.00167	1.55084	1.6246
chr2_196544755_196548630_+	hsa_circSLC39A10_003	hsa_circ_0057551	SLC39A10	2.4503	up	1.29299	0.0148285	0.268437	0.883539	1.0472	0.563941	0.253844
chr2_198281464_198285266_-	hsa_circSF3B1_007	hsa_circ_0002652	SF3B1	39.2696	up	5.29534	0.00137841	0.122184	0.25244	0.227653	0	0
chr2_203620260_203624076_+	hsa_circFAM117B_006	hsa_circ_0118701	FAM117B	2.4525	up	1.29425	0.0346957	0.334172	0.589026	0.591897	0.28197	0.203076
chr2_203818727_203820481_+	hsa_circALS2CR8_017	hsa_circ_0003493	CARF	35.9389	up	5.16747	0.00207171	0.127925	0.168293	0.273183	0	0
chr2_207988497_207989128_-	#N/A	#N/A	KLF7	-33.9207	down	-5.08409	0.00104374	0.115467	0	0	0.211478	0.203076
chr2_215632205_215661841_-	hsa_circBARD1_003	hsa_circ_0058051	BARD1	-2.8102	down	-1.4907	0.043389	0.365717	0.12622	0.136592	0.28197	0.45692
chr2_243056789_243081039_+	hsa_circAC093642.5_001	hsa_circ_0119525	LOC728323	5.0666	up	2.34102	0.0417947	0.365366	0.210366	0.136592	0	0.0507689
chr20_3199162_3199640_+	hsa_circITPA_007	hsa_circ_0008156	ITPA	3.8006	up	1.92623	0.0325718	0.32577	0.462806	0.227653	0	0.152307
chr20_17937576_17941969_-	hsa_circSNX5_003	hsa_circ_0009173	SNX5	21.8967	up	4.45264	0.012441	0.256199	0.12622	0.136592	0	0
chr20_30115286_30115853_+	hsa_circHM13_003	hsa_circ_0002035	HM13	4.1254	up	2.04454	0.0383782	0.350417	0.168293	0.364244	0.0704926	0.0507689
chr20_34317233_34320057_-	hsa_circRBM39_010	hsa_circ_0008817	RBM39	-2.467	down	-1.30276	0.0177521	0.275262	0.25244	0.318714	0.775419	0.659995
chr20_35532559_35533906_-	hsa_circSAMHD1_015	hsa_circ_0060221	SAMHD1	21.8063	up	4.44667	0.0167171	0.274218	0.168293	0.091061	0	0
chr20_35532559_35540955_-	hsa_circSAMHD1_014	hsa_circ_0115114	SAMHD1	-4.8762	down	-2.28576	0.0213767	0.278865	0.0841466	0	0.28197	0.203076
chr20_35812582_35812776_+	hsa_circRPN2_004	hsa_circ_0005759	RPN2	18.4566	up	4.20606	0.0259354	0.290294	0.0841466	0.136592	0	0
chr20_37159809_37161502_+	hsa_circRALGAPB_023	hsa_circ_0060342	RALGAPB	36.3452	up	5.18369	0.00475288	0.176636	0.0841466	0.364244	0	0
chr20_40141484_40143591_-	hsa_circCHD6_014	hsa_circ_0060420	CHD6	3.7752	up	1.91656	0.0431496	0.365717	0.25244	0.227653	0.0704926	0.0507689
chr20_43132455_43133532_-	hsa_circSERINC3_017	hsa_circ_0060484	SERINC3	-7.6164	down	-2.92912	0.01027	0.244171	0.0420733	0	0.28197	0.152307
chr20_43607083_43653771_+	hsa_circSTK4_008	hsa_circ_0060526	STK4	5.0667	up	2.34103	0.0418312	0.365366	0.210366	0.136592	0	0.0507689
chr20_45874751_45878183_-	hsa_circZMYND8_052	hsa_circ_0001163	ZMYND8	5.6747	up	2.50455	0.0232201	0.280002	0.210366	0.182122	0	0.0507689
chr20_46252654_46262380_+	hsa_circNCOA3_008	hsa_circ_0001165	NCOA3	8.8137	up	3.13975	0.00431911	0.165694	0.210366	0.409775	0	0.0507689
chr20_50071084_50140649_-	#N/A	#N/A	NFATC2	-3.6191	down	-1.85563	0.0162355	0.274218	0.0420733	0.182122	0.422956	0.406151
chr20_50133322_50140135_-	hsa_circNFATC2_002	hsa_circ_0001170	NFATC2	-1.9953	down	-0.996588	0.0422422	0.365717	0.462806	0.455305	1.05739	0.812302
chr20_55048356_55052180_+	hsa_circC20orf43_001	hsa_circ_0060953	RTFDC1	25.4666	up	4.67054	0.0151605	0.268437	0.12622	0.182122	0	0
chr21_17150222_17214859_+	hsa_circUSP25_024	hsa_circ_0115656	USP25	18.3534	up	4.19798	0.0379262	0.348965	0.12622	0.091061	0	0
chr21_30693541_30702014_+	hsa_circBACH1_008	hsa_circ_0001181	BACH1	-2.8391	down	-1.50542	0.00278256	0.140159	0.294513	0.409775	1.05739	0.964609
chr21_30698379_30702014_+	hsa_circBACH1_012	hsa_circ_0061395	BACH1	-2.9517	down	-1.56153	0.00334428	0.143731	0.50488	0.182122	1.12788	0.964609
chr21_34787194_34805178_+	hsa_circIFNGR2_008	hsa_circ_0002660	IFNGR2	-3.1459	down	-1.65349	0.0231552	0.280002	0.210366	0.091061	0.352463	0.609227
chr21_34931535_34932081_+	hsa_circSON_009	hsa_circ_0115855	SON	18.3674	up	4.19908	0.0300866	0.311799	0.12622	0.091061	0	0
chr21_37619814_37623582_+	hsa_circDOPEY2_024	hsa_circ_0007193	DOPEY2	-2.4138	down	-1.27133	0.0467498	0.369034	0.25244	0.182122	0.634434	0.45692
chr21_40600425_40601362_-	hsa_circBRWD1_085	hsa_circ_0001195	BRWD1	4.8079	up	2.26542	0.0143036	0.268437	0.336586	0.273183	0	0.101538
chr21_45165959_45168961_+	hsa_circPDXK_011	hsa_circ_0008021	PDXK	-5.3871	down	-2.42952	0.0142166	0.268437	0	0.091061	0.211478	0.304613
chr22_21288066_21288532_+	hsa_circCRKL_002	hsa_circ_0001206	CRKL	-2.2416	down	-1.16453	0.0400976	0.357869	0.25244	0.318714	0.563941	0.710764
chr22_31858917_31859953_-	hsa_circEIF4ENIF1_004	hsa_circ_0116447	EIF4ENIF1	21.7791	up	4.44487	0.0210417	0.278818	0.168293	0.091061	0	0
chr22_32121523_32134897_-	hsa_circPRR14L_001	hsa_circ_0116463	PRR14L	18.4258	up	4.20366	0.0205797	0.277065	0.0841466	0.136592	0	0
chr22_40669428_40681774_+	hsa_circTNRC6B_014	hsa_circ_0063411	TNRC6B	-4.1607	down	-2.05682	0.018649	0.275262	0.0420733	0.091061	0.211478	0.355382
chr22_42204878_42209826_+	hsa_circCCDC134_005	hsa_circ_0008806	CCDC134	-3.384	down	-1.75872	0.0180906	0.275262	0.12622	0.091061	0.422956	0.355382
chr22_42807412_42807742_-	hsa_circNFAM1_001	hsa_circ_0001240	NFAM1	-2.3209	down	-1.21466	0.0274901	0.297001	0.420733	0.455305	0.563941	1.42153
chr22_43435785_43442579_-	hsa_circTTLL1_014	hsa_circ_0116692	TTLL1	3.3404	up	1.74002	0.0455653	0.365936	0.25244	0.364244	0	0.152307
chr22_47370185_47393605_+	hsa_circTBC1D22A_024	hsa_circ_0001252	TBC1D22A	18.3833	up	4.20032	0.0243117	0.280002	0.12622	0.091061	0	0
chr3_3209317_3216953_-	hsa_circCRBN_001	hsa_circ_0123499	CRBN	-4.8415	down	-2.27545	0.0177689	0.275262	0.0420733	0.0455305	0.211478	0.253844
chr3_9429770_9432181_-	#N/A	#N/A	THUMPD3-AS1	6.9186	up	2.79048	0.0109462	0.244171	0.210366	0.273183	0	0.0507689
chr3_9495422_9506356_+	hsa_circSETD5_033	hsa_circ_0008465	SETD5	-6.5285	down	-2.70675	0.019864	0.275262	0.0420733	0	0.211478	0.152307
chr3_11399891_11421526_+	hsa_circATG7_052	hsa_circ_0008927	ATG7	-7.8526	down	-2.97317	0.000146378	0.0328506	0.0841466	0.0455305	0.493448	0.609227
chr3_16343132_16344255_+	hsa_circOXNAD1_009	hsa_circ_0122600	OXNAD1	2.3528	up	1.23437	0.0423792	0.365717	1.38842	1.00167	0.140985	0.812302
chr3_16343132_16345099_+	hsa_circOXNAD1_010	hsa_circ_0122601	OXNAD1	5.1259	up	2.35782	0.00107349	0.115794	0.715246	0.546366	0.140985	0.101538
chr3_18504971_18568818_+	hsa_circTCONS_l2_00018461_002	hsa_circ_0123034	not_annotated	2.878	up	1.52508	0.0493658	0.382464	0.336586	0.364244	0.0704926	0.152307
chr3_31617887_31641951_+	hsa_circSTT3B_005	hsa_circ_0003338	STT3B	6.2681	up	2.64802	0.0191558	0.275262	0.168293	0.273183	0.0704926	0
chr3_32586367_32587457_-	hsa_circDYNC1LI1_001	hsa_circ_0123513	DYNC1LI1	-10.7692	down	-3.42884	0.00125406	0.122184	0.0420733	0	0.352463	0.253844
chr3_32774914_32776468_+	hsa_circCNOT10_022	hsa_circ_0123527	CNOT10	18.4443	up	4.2051	0.023483	0.280002	0.0841466	0.136592	0	0
chr3_37323448_37343823_+	hsa_circGOLGA4_008	hsa_circ_0123693	GOLGA4	-4.2112	down	-2.07423	0.0159978	0.274218	0.0841466	0.0455305	0.352463	0.253844
chr3_38240212_38278452_+	hsa_circOXSR1_010	hsa_circ_0123733	OXSR1	22.0251	up	4.46108	0.0193151	0.275262	0.0841466	0.182122	0	0
chr3_43640023_43647355_-	hsa_circANO10_002	hsa_circ_0003533	ANO10	-4.2721	down	-2.09494	0.0350965	0.334172	0.0420733	0.0455305	0.28197	0.152307
chr3_50004902_50012825_+	hsa_circRBM6_005	hsa_circ_0065769	RBM6	2.6855	up	1.4252	0.0348293	0.334172	0.715246	0.409775	0.211478	0.203076
chr3_51575513_51586079_+	hsa_circRAD54L2_001	hsa_circ_0001306	RAD54L2	2.862	up	1.51702	0.0261874	0.291059	5.80611	0.956141	1.40985	0.964609
chr3_56597711_56601081_+	hsa_circCCDC66_002	hsa_circ_0124281	CCDC66	5.723	up	2.51677	0.0329915	0.32696	0.12622	0.273183	0	0.0507689
chr3_56700287_56707753_-	hsa_circFAM208A_008	hsa_circ_0066241	FAM208A	5.0481	up	2.33575	0.0483256	0.3781	0.12622	0.227653	0.0704926	0
chr3_57875767_57882659_+	hsa_circSLMAP_031	hsa_circ_0002693	SLMAP	3.9823	up	1.99359	0.0187817	0.275262	0.462806	0.273183	0.0704926	0.101538
chr3_66286967_66313803_+	hsa_circSLC25A26_003	hsa_circ_0003101	SLC25A26	25.4115	up	4.66741	0.00748733	0.220162	0.12622	0.182122	0	0
chr3_71090478_71102924_-	hsa_circFOXP1_018	hsa_circ_0008234	FOXP1	2.8144	up	1.49284	0.0208222	0.277604	1.22013	1.45698	0.0704926	0.812302
chr3_101535638_101540594_+	hsa_circFAM55C_007	hsa_circ_0004385	NXPE3	-3.8183	down	-1.93294	0.0324571	0.325735	0.0841466	0.0455305	0.352463	0.203076
chr3_122459104_122459960_-	hsa_circHSPBAP1_008	hsa_circ_0121640	HSPBAP1	-6.4995	down	-2.70033	0.0219246	0.278865	0.0420733	0	0.140985	0.203076
chr3_122942405_122978436_+	hsa_circSEC22A_009	hsa_circ_0002236	SEC22A	8.7381	up	3.12732	0.00371837	0.152382	0.37866	0.227653	0	0.0507689
chr3_127980970_127983624_+	hsa_circEEFSEC_005	hsa_circ_0008759	EEFSEC	5.1546	up	2.36587	0.00950823	0.23552	0.294513	0.364244	0	0.101538
chr3_132202218_132203516_+	hsa_circDNAJC13_038	hsa_circ_0004091	DNAJC13	-7.5628	down	-2.91891	0.00807967	0.223906	0	0.0455305	0.211478	0.203076
chr3_141231004_141248644_+	hsa_circRASA2_010	hsa_circ_0122180	RASA2	32.332	up	5.01489	0.00173204	0.122184	0.210366	0.182122	0	0
chr3_149563797_149613357_+	hsa_circRNF13_006	hsa_circ_0003956	RNF13	21.9952	up	4.45912	0.0160129	0.274218	0.0841466	0.182122	0	0
chr3_167240102_167254788_-	hsa_circWDR49_019	hsa_circ_0122613	WDR49	-10.5986	down	-3.4058	0.00166677	0.122184	0	0.0455305	0.211478	0.355382
chr3_169840378_169854453_-	#N/A	#N/A	PHC3	5.0668	up	2.34109	0.0419974	0.365366	0.210366	0.136592	0	0.0507689
chr3_170841384_170846667_-	hsa_circTNIK_029	hsa_circ_0067943	TNIK	21.904	up	4.45312	0.018191	0.275262	0.12622	0.136592	0	0
chr3_171944660_171969331_+	hsa_circFNDC3B_026	hsa_circ_0067985	FNDC3B	-9.7341	down	-3.28304	0.0027494	0.140159	0	0.0455305	0.352463	0.203076
chr3_171965322_171969331_+	hsa_circFNDC3B_029	hsa_circ_0006156	FNDC3B	-1.7023	down	-0.767466	1.16103e-06	0.000460251	4.62806	5.23601	9.587	7.41226
chr3_171969049_171979873_+	hsa_circFNDC3B_036	hsa_circ_0122728	FNDC3B	-2.6598	down	-1.41133	0.0217265	0.278865	0.210366	0.227653	0.634434	0.558458
chr3_171969049_172025291_+	hsa_circFNDC3B_038	hsa_circ_0067991	FNDC3B	-8.61	down	-3.10601	0.00371921	0.152382	0.0420733	0	0.211478	0.253844
chr3_179118908_179144030_-	hsa_circGNB4_005	hsa_circ_0005319	GNB4	-6.5284	down	-2.70673	0.0198474	0.275262	0.0420733	0	0.211478	0.152307
chr3_182554858_182566345_+	#N/A	#N/A	ATP11B	18.4042	up	4.20196	0.0194167	0.275262	0.12622	0.091061	0	0
chr3_185318552_185331196_+	hsa_circSENP2_011	hsa_circ_0123061	SENP2	21.8174	up	4.44741	0.0153883	0.269125	0.168293	0.091061	0	0
chr3_195016436_195022903_-	hsa_circACAP2_038	hsa_circ_0002382	ACAP2	-4.3987	down	-2.13707	0.00851616	0.225063	0.0420733	0.136592	0.28197	0.507689
chr3_195685882_195686957_-	hsa_circSDHAP1_006	hsa_circ_0008756	SDHAP1	18.3655	up	4.19892	0.0309836	0.316285	0.12622	0.091061	0	0
chr3_196118683_196129890_-	hsa_circUBXN7_006	hsa_circ_0001380	UBXN7	2.8338	up	1.50276	0.012557	0.256367	1.22013	0.591897	0.140985	0.45692
chr3_197592293_197598333_+	hsa_circLRCH3_066	hsa_circ_0008106	LRCH3	25.3388	up	4.66328	0.0095459	0.23552	0.168293	0.136592	0	0
chr4_1219147_1232125_-	hsa_circCTBP1_005	hsa_circ_0068837	CTBP1	21.8935	up	4.45243	0.0108814	0.244171	0.12622	0.136592	0	0
chr4_2492063_2498848_+	hsa_circRNF4_002	hsa_circ_0008872	RNF4	18.4512	up	4.20564	0.024797	0.281454	0.0841466	0.136592	0	0
chr4_2951660_2952972_-	hsa_circNOP14_007	hsa_circ_0006737	NOP14	-3.874	down	-1.95384	0.0151275	0.268437	0.12622	0.0455305	0.422956	0.304613
chr4_3188323_3190820_+	hsa_circHTT_070	hsa_circ_0126192	HTT	21.7609	up	4.44366	0.0252033	0.284105	0.168293	0.091061	0	0
chr4_6925099_6925838_+	hsa_circTBC1D14_002	hsa_circ_0001394	TBC1D14	-3.4022	down	-1.76645	0.00542735	0.189838	0.37866	0.409775	2.11478	0.659995
chr4_15626874_15646331_-	hsa_circFBXL5_004	hsa_circ_0069227	FBXL5	-5.0201	down	-2.32771	0.000194838	0.0355045	0.210366	0.091061	0.704926	0.863071
chr4_36230203_36231267_-	hsa_circARAP2_001	hsa_circ_0069399	ARAP2	-2.036	down	-1.02574	4.37984e-07	0.000231499	2.9872	3.50585	6.90828	6.34611
chr4_38037208_38055959_+	hsa_circTBC1D1_015	hsa_circ_0069420	TBC1D1	-8.6074	down	-3.10557	0.00377993	0.152382	0	0.0455305	0.211478	0.253844
chr4_39077584_39088347_+	hsa_circKLHL5_003	hsa_circ_0069443	KLHL5	3.0585	up	1.6128	0.0236951	0.280002	0.546953	0.591897	0.352463	0.0507689
chr4_39734978_39747430_+	#N/A	#N/A	UBE2K	6.3147	up	2.65872	0.0183037	0.275262	0.168293	0.273183	0	0.0507689
chr4_39843567_39846421_-	hsa_circPDS5A_093	hsa_circ_0006865	PDS5A	-5.7245	down	-2.51716	0.0285263	0.303426	0	0.091061	0.493448	0.101538
chr4_39900008_39904080_-	hsa_circPDS5A_060	hsa_circ_0001405	PDS5A	18.4198	up	4.20318	0.0197904	0.275262	0.0841466	0.136592	0	0
chr4_56277780_56284152_+	hsa_circTMEM165_005	hsa_circ_0001414	TMEM165	-2.1135	down	-1.07964	0.00174827	0.122184	1.38842	1.32038	2.96069	2.79229
chr4_72102292_72121116_+	hsa_circSLC4A4_001	hsa_circ_0069922	SLC4A4	21.9018	up	4.45298	0.0160221	0.274218	0.12622	0.136592	0	0
chr4_77055327_77065626_-	hsa_circNUP54_005	hsa_circ_0070039	NUP54	-2.6288	down	-1.39441	0.00841709	0.225063	0.294513	0.409775	1.19837	0.710764
chr4_78663294_78697546_-	#N/A	#N/A	CNOT6L	18.3868	up	4.2006	0.0233272	0.280002	0.12622	0.091061	0	0
chr4_83375874_83378191_+	hsa_circENOPH1_006	hsa_circ_0003451	ENOPH1	6.9551	up	2.79808	0.0142418	0.268437	0.168293	0.318714	0	0.0507689
chr4_83799882_83803093_-	hsa_circSEC31A_007	hsa_circ_0006618	SEC31A	-2.0749	down	-1.05301	0.029318	0.307193	0.420733	0.546366	1.05739	0.964609
chr4_84391355_84393441_-	hsa_circFAM175A_002	hsa_circ_0009036	FAM175A	32.0486	up	5.00219	0.0046797	0.175286	0.294513	0.091061	0	0
chr4_89570990_89575284_+	#N/A	#N/A	HERC3	18.358	up	4.19834	0.0349732	0.334172	0.12622	0.091061	0	0
chr4_102776191_102791801_+	#N/A	#N/A	BANK1	25.3316	up	4.66286	0.0112288	0.246008	0.168293	0.136592	0	0
chr4_106155053_106158508_+	hsa_circTET2_005	hsa_circ_0070562	TET2	-2.5953	down	-1.3759	3.88024e-08	2.6369e-05	2.27196	2.04887	6.13286	5.17843
chr4_106317405_106359193_-	hsa_circPPA2_019	hsa_circ_0124937	PPA2	21.8131	up	4.44712	0.0158816	0.274218	0.168293	0.091061	0	0
chr4_108603170_108622441_-	hsa_circPAPSS1_003	hsa_circ_0006935	PAPSS1	-6.0212	down	-2.59004	0.00534132	0.188212	0.0420733	0.0455305	0.28197	0.304613
chr4_108984778_109000770_-	#N/A	#N/A	LEF1	5.7229	up	2.51675	0.0329723	0.32696	0.12622	0.273183	0	0.0507689
chr4_108991818_109000770_-	#N/A	#N/A	LEF1	28.855	up	4.85075	0.00293784	0.140159	0.168293	0.182122	0	0
chr4_129857809_129891623_-	hsa_circSCLT1_023	hsa_circ_0070960	SCLT1	-2.505	down	-1.32482	0.0212501	0.278865	0.168293	0.455305	0.986897	0.609227
chr4_140037802_140060651_-	hsa_circELF2_006	hsa_circ_0007710	ELF2	-2.6795	down	-1.42194	0.0118222	0.248841	0.168293	0.409775	0.916404	0.659995
chr4_140314744_140325644_+	#N/A	#N/A	not_annotated	21.8933	up	4.45242	0.010819	0.244171	0.12622	0.136592	0	0
chr4_140616350_140625350_+	hsa_circMGST2_001	hsa_circ_0125390	MGST2	-4.7144	down	-2.23706	0.0274262	0.297001	0.0420733	0.091061	0.0704926	0.558458
chr4_148554915_148555709_+	hsa_circTMEM184C_004	hsa_circ_0125469	TMEM184C	18.404	up	4.20195	0.0194572	0.275262	0.12622	0.091061	0	0
chr4_149073619_149076052_-	hsa_circNR3C2_002	hsa_circ_0125480	NR3C2	5.4927	up	2.45752	0.0286456	0.303491	0.589026	0.091061	0	0.101538
chr4_169321976_169379159_-	#N/A	#N/A	DDX60L	-4.9905	down	-2.3192	0.00843352	0.225063	0.12622	0	0.28197	0.406151
chr4_178274461_178281831_+	hsa_circNEIL3_011	hsa_circ_0001460	NEIL3	-1.6416	down	-0.71506	0.0287882	0.304323	1.76708	1.73016	2.67872	3.04613
chr4_185580493_185599548_+	hsa_circCCDC111_012	hsa_circ_0003788	PRIMPOL	-3.5708	down	-1.83625	0.0435495	0.365717	0.0841466	0.136592	0.704926	0.152307
chr4_186096939_186097205_-	hsa_circKIAA1430_005	hsa_circ_0004697	KIAA1430	25.3291	up	4.66272	0.0119396	0.250207	0.168293	0.136592	0	0
chr5_21491429_21497305_+	hsa_circGUSBP1_005	hsa_circ_0128780	GUSBP1	-4.112	down	-2.03986	0.00162513	0.122184	0.168293	0.136592	0.634434	0.659995
chr5_36136410_36143508_-	hsa_circLMBRD2_003	hsa_circ_0001471	LMBRD2	21.8936	up	4.45244	0.0109575	0.244171	0.12622	0.136592	0	0
chr5_40852275_40854198_+	hsa_circCARD6_001	hsa_circ_0005895	CARD6	-2.817	down	-1.49416	0.0162297	0.274218	0.210366	0.227653	0.775419	0.507689
chr5_49694940_49711924_-	#N/A	#N/A	EMB	-6.5231	down	-2.70557	0.0200922	0.275262	0	0.0455305	0.211478	0.152307
chr5_49694940_49724061_-	hsa_circEMB_001	hsa_circ_0129104	EMB	-7.2056	down	-2.84912	0.0014941	0.122184	0.0420733	0.0455305	0.352463	0.355382
chr5_55256229_55264224_-	hsa_circIL6ST_007	hsa_circ_0007304	IL6ST	18.4558	up	4.206	0.0257655	0.289072	0.0841466	0.136592	0	0
chr5_59934576_59943360_-	hsa_circDEPDC1B_004	hsa_circ_0002512	DEPDC1B	-24.4291	down	-4.61053	0.0106464	0.244171	0	0	0.140985	0.152307
chr5_61642956_61651081_+	hsa_circKIF2A_005	hsa_circ_0129276	KIF2A	18.4457	up	4.20521	0.0237293	0.280002	0.0841466	0.136592	0	0
chr5_68602643_68609870_-	hsa_circCCDC125_003	hsa_circ_0129455	CCDC125	21.8948	up	4.45252	0.0114905	0.246008	0.12622	0.136592	0	0
chr5_70888752_70900295_+	hsa_circMCCC2_004	hsa_circ_0072904	MCCC2	49.1726	up	5.61978	0.000766388	0.0985327	0.462806	0.136592	0	0
chr5_74011334_74012498_+	hsa_circHEXB_005	hsa_circ_0007559	HEXB	-3.5365	down	-1.82232	0.0231689	0.280002	0.0841466	0.091061	0.352463	0.304613
chr5_74412390_74414122_-	hsa_circANKRD31_003	hsa_circ_0129612	ANKRD31	18.4076	up	4.20223	0.0188031	0.275262	0.12622	0.091061	0	0
chr5_74981031_74998635_-	hsa_circPOC5_004	hsa_circ_0073057	POC5	-28.8337	down	-4.84968	0.00514283	0.18257	0	0	0.140985	0.203076
chr5_77385216_77425131_-	hsa_circAP3B1_030	hsa_circ_0008164	AP3B1	-3.5365	down	-1.82232	0.0231519	0.280002	0.0841466	0.091061	0.352463	0.304613
chr5_78734832_78752841_-	hsa_circHOMER1_004	hsa_circ_0006916	HOMER1	3.3837	up	1.75859	0.0209854	0.278818	0.546953	0.455305	0	0.253844
chr5_79498704_79501179_-	#N/A	#N/A	SERINC5	22.0406	up	4.46209	0.0215642	0.278865	0.0841466	0.182122	0	0
chr5_82815167_82818128_+	hsa_circVCAN_005	hsa_circ_0073236	VCAN	-3.7612	down	-1.91121	0.00326708	0.143731	0.37866	0.136592	1.55084	0.507689
chr5_82832825_82838087_+	hsa_circVCAN_009	hsa_circ_0073237	VCAN	-4.7431	down	-2.24584	6.36003e-07	0.000302547	0.841466	1.41145	7.54271	3.24921
chr5_82832825_82843903_+	hsa_circVCAN_010	hsa_circ_0073238	VCAN	-6.6258	down	-2.72809	0.00246806	0.136415	0.0420733	0.0455305	0.352463	0.304613
chr5_82832825_82850857_+	hsa_circVCAN_011	hsa_circ_0073239	VCAN	-5.0751	down	-2.34344	1.89416e-05	0.00474238	0.25244	0.409775	2.11478	1.31999
chr5_94204037_94248681_-	hsa_circMCTP1_028	hsa_circ_0005540	MCTP1	-4.7818	down	-2.25756	0.00297026	0.140159	0.0841466	0.091061	0.422956	0.45692
chr5_94204037_94259726_-	hsa_circMCTP1_021	hsa_circ_0006639	MCTP1	-3.1033	down	-1.63382	0.0383834	0.350417	0.168293	0.0455305	0.28197	0.406151
chr5_94224583_94248681_-	hsa_circMCTP1_027	hsa_circ_0001512	MCTP1	-5.0962	down	-2.34942	0.00693515	0.21301	0.0841466	0.0455305	0.493448	0.253844
chr5_96434640_96438798_+	#N/A	#N/A	not_annotated	5.7881	up	2.5331	0.00409172	0.160862	0.336586	0.409775	0.0704926	0.0507689
chr5_96437462_96438798_+	hsa_circLIX1_002	hsa_circ_0001516	not_annotated	5.2067	up	2.38036	9.21228e-06	0.00292152	1.93537	1.50251	0.352463	0.304613
chr5_98228228_98230390_-	hsa_circCHD1_011	hsa_circ_0130107	CHD1	25.3466	up	4.66372	0.00815496	0.223906	0.168293	0.136592	0	0
chr5_109103235_109110666_+	hsa_circMAN2A1_027	hsa_circ_0008819	MAN2A1	21.7893	up	4.44555	0.0192052	0.275262	0.168293	0.091061	0	0
chr5_112102022_112137080_+	hsa_circAPC_011	hsa_circ_0073587	APC	21.7946	up	4.4459	0.0183534	0.275262	0.168293	0.091061	0	0
chr5_112868575_112871495_+	hsa_circYTHDC2_005	hsa_circ_0127646	YTHDC2	5.6807	up	2.50606	0.0245393	0.280002	0.168293	0.227653	0	0.0507689
chr5_114875361_114878598_-	hsa_circFEM1C_004	hsa_circ_0127686	not_annotated	21.8189	up	4.44751	0.0152197	0.268437	0.168293	0.091061	0	0
chr5_122137563_122139308_+	hsa_circSNX2_007	hsa_circ_0073692	SNX2	5.79	up	2.53356	0.0455764	0.365936	0.0841466	0.318714	0	0.0507689
chr5_134010304_134011815_+	hsa_circSEC24A_022	hsa_circ_0004345	SEC24A	3.2929	up	1.71937	0.0453479	0.365936	0.37866	0.227653	0.0704926	0.101538
chr5_137759763_137761271_+	hsa_circKDM3B_034	hsa_circ_0004763	KDM3B	-4.8801	down	-2.2869	0.024286	0.280002	0.12622	0	0.563941	0.152307
chr5_140960310_140963182_-	hsa_circDIAPH1_010	hsa_circ_0074323	DIAPH1	-5.4411	down	-2.44391	0.00962869	0.23552	0.0420733	0.0455305	0.28197	0.253844
chr5_141511372_141524241_+	hsa_circNDFIP1_005	hsa_circ_0128176	NDFIP1	-29.4641	down	-4.88089	0.00332725	0.143731	0	0	0.211478	0.152307
chr5_142252964_142264964_+	hsa_circARHGAP26_001	hsa_circ_0128188	ARHGAP26	18.4766	up	4.20763	0.0312784	0.318611	0.0841466	0.136592	0	0
chr5_167915606_167922441_+	hsa_circRARS_005	hsa_circ_0074874	RARS	18.4872	up	4.20846	0.0351336	0.334172	0.0841466	0.136592	0	0
chr5_179134132_179137066_+	hsa_circCANX_014	hsa_circ_0075298	CANX	-7.6078	down	-2.92748	0.0105786	0.244171	0	0.0455305	0.28197	0.152307
chr6_13579682_13584457_+	hsa_circSIRT5_002	hsa_circ_0007218	SIRT5	2.1064	up	1.07478	0.00201087	0.127653	3.36586	2.82289	1.33936	1.57384
chr6_16326624_16328701_-	hsa_circATXN1_029	hsa_circ_0007132	ATXN1	-1.7613	down	-0.81661	0.0284338	0.303426	1.30427	2.32206	3.17217	3.19844
chr6_18160113_18166609_+	hsa_circKDM1B_005	hsa_circ_0001580	KDM1B	-4.0818	down	-2.0292	0.00601725	0.201578	0.210366	0.091061	0.916404	0.406151
chr6_18256591_18258636_-	hsa_circDEK_001	hsa_circ_0008846	DEK	-3.8121	down	-1.93058	0.0332101	0.328173	0.0420733	0.091061	0.352463	0.203076
chr6_25551137_25557078_+	hsa_circLRRC16A_058	hsa_circ_0075878	LRRC16A	18.4236	up	4.20348	0.0202849	0.275701	0.0841466	0.136592	0	0
chr6_74432973_74446231_+	hsa_circCD109_003	hsa_circ_0002465	CD109	4.7811	up	2.25735	0.0129103	0.256964	0.294513	0.318714	0.0704926	0.0507689
chr6_76412360_76412788_+	hsa_circSENP6_051	hsa_circ_0001614	SENP6	2.2166	up	1.14834	0.0178807	0.275262	1.13598	1.22932	0.493448	0.558458
chr6_83806449_83810605_+	hsa_circDOPEY1_004	hsa_circ_0132409	DOPEY1	21.795	up	4.44592	0.0183026	0.275262	0.168293	0.091061	0	0
chr6_84894904_84896341_-	hsa_circKIAA1009_024	hsa_circ_0077223	CEP162	-3.9931	down	-1.99749	0.0188412	0.275262	0.210366	0	0.563941	0.355382
chr6_87925620_87928449_+	hsa_circZNF292_006	hsa_circ_0004058	ZNF292	2.4896	up	1.31591	0.0201137	0.275262	0.799393	1.54804	0.352463	0.558458
chr6_89554075_89563483_-	hsa_circRNGTT_017	hsa_circ_0077292	RNGTT	35.7638	up	5.16043	0.00151492	0.122184	0.25244	0.182122	0	0
chr6_111708967_111793343_-	hsa_circREV3L_013	hsa_circ_0077657	REV3L	18.3765	up	4.19979	0.0264989	0.292732	0.12622	0.091061	0	0
chr6_117010482_117013319_+	#N/A	#N/A	KPNA5	3.5083	up	1.81079	0.0294051	0.307429	0.336586	0.318714	0.140985	0.0507689
chr6_117019866_117026323_+	hsa_circKPNA5_014	hsa_circ_0001639	KPNA5	2.3429	up	1.2283	0.0169495	0.275262	1.38842	0.956141	0.422956	0.558458
chr6_117037381_117045538_+	hsa_circKPNA5_016	hsa_circ_0130446	KPNA5	18.4742	up	4.20744	0.0305368	0.313744	0.0841466	0.136592	0	0
chr6_129932677_129939997_-	hsa_circARHGAP18_006	hsa_circ_0006887	ARHGAP18	21.8199	up	4.44757	0.0151144	0.268437	0.168293	0.091061	0	0
chr6_131276244_131277639_-	hsa_circEPB41L2_001	hsa_circ_0001640	EPB41L2	6.3145	up	2.65868	0.0182742	0.275262	0.168293	0.273183	0	0.0507689
chr6_139264649_139265759_-	hsa_circREPS1_006	hsa_circ_0004368	REPS1	3.2391	up	1.69558	0.000162211	0.0335496	2.56647	2.6863	0.493448	1.06615
chr6_144086397_144098520_+	hsa_circPHACTR2_004	hsa_circ_0130891	PHACTR2	-29.3636	down	-4.87595	0.00227459	0.13076	0	0	0.211478	0.152307
chr6_145103057_145124283_+	hsa_circUTRN_091	hsa_circ_0001648	UTRN	-2.2551	down	-1.17322	0.0235373	0.280002	0.294513	0.455305	0.704926	0.964609
chr6_149854593_149856874_-	hsa_circPPIL4_006	hsa_circ_0078208	PPIL4	18.464	up	4.20665	0.027693	0.298044	0.0841466	0.136592	0	0
chr6_158703294_158735300_+	hsa_circTCONS_00011401_003	hsa_circ_0131196	TULP4	2.1705	up	1.11802	0.0328463	0.326883	0.757319	1.18379	0.422956	0.45692
chr6_158994451_159010814_+	hsa_circTMEM181_013	hsa_circ_0004587	TMEM181	-2.2974	down	-1.2	0.0281248	0.302008	0.420733	0.591897	0.704926	1.57384
chr6_159146534_159166690_+	#N/A	#N/A	SYTL3	18.4787	up	4.20779	0.031969	0.321515	0.0841466	0.136592	0	0
chr6_161455290_161471011_+	hsa_circMAP3K4_004	hsa_circ_0078617	MAP3K4	-6.5232	down	-2.70557	0.0200992	0.275262	0	0.0455305	0.211478	0.152307
chr6_170626457_170632347_+	hsa_circFAM120B_003	hsa_circ_0078768	FAM120B	-5.4542	down	-2.44736	0.0115488	0.246008	0.0841466	0	0.28197	0.253844
chr6_mcf_hap5_1371325_1385642_-	#N/A	#N/A	ZNRD1-AS1	32.397	up	5.01779	0.00312795	0.141711	0.168293	0.227653	0	0
chr6_qbl_hap6_3725956_3787314_-	#N/A	#N/A	HLA-DRB1	-222.121	down	-7.7952	1.50482e-14	1.78961e-11	0	0	1.40985	1.37076
chr7_810107_814799_+	hsa_circHEATR2_010	hsa_circ_0001667	HEATR2	-7.5633	down	-2.91902	0.00807785	0.223906	0.0420733	0	0.211478	0.203076
chr7_5963017_5963593_+	hsa_circCCZ1_014	hsa_circ_0007177	CCZ1	3.5631	up	1.83315	0.00683374	0.21301	1.09391	1.91228	0.0704926	0.710764
chr7_6840578_6841154_-	hsa_circCCZ1B_015	hsa_circ_0007135	CCZ1B	3.1503	up	1.65547	0.00260145	0.139046	1.80915	2.32206	0.28197	0.964609
chr7_7916911_7923977_+	hsa_circAC006465.3_003	hsa_circ_0134762	RPA3OS	32.3885	up	5.01741	0.00279232	0.140159	0.168293	0.227653	0	0
chr7_17929985_17937069_-	hsa_circSNX13_003	hsa_circ_0079524	SNX13	3.0199	up	1.59452	0.0197943	0.275262	0.631099	0.455305	0.140985	0.203076
chr7_27668989_27689252_-	hsa_circHIBADH_002	hsa_circ_0006773	HIBADH	2.2499	up	1.16989	0.0392604	0.352721	0.925612	0.546366	0.352463	0.304613
chr7_30590251_30601744_-	hsa_circTCONS_00012989_001	hsa_circ_0001693	LOC401320	-2.2112	down	-1.14482	0.0389772	0.352721	0.37866	0.227653	0.775419	0.609227
chr7_35707043_35712888_-	hsa_circHERPUD2_005	hsa_circ_0001696	HERPUD2	2.5667	up	1.35993	0.0304773	0.313744	0.462806	0.956141	0.422956	0.152307
chr7_37896875_37916609_+	#N/A	#N/A	NME8	18.3863	up	4.20056	0.0234648	0.280002	0.12622	0.091061	0	0
chr7_43647854_43659322_+	#N/A	#N/A	STK17A	18.4455	up	4.2052	0.023699	0.280002	0.0841466	0.136592	0	0
chr7_64004084_64004810_-	hsa_circZNF680_003	hsa_circ_0002566	ZNF680	2.4226	up	1.27653	0.0200579	0.275262	0.715246	0.86508	0.211478	0.406151
chr7_65592690_65599361_+	hsa_circCRCP_004	hsa_circ_0004604	CRCP	2.699	up	1.43243	0.0432408	0.365717	0.420733	0.546366	0.0704926	0.253844
chr7_72361165_72361649_+	hsa_circPOM121_003	hsa_circ_0003261	POM121	3.2722	up	1.71028	0.00754391	0.220162	0.546953	0.819549	0.0704926	0.304613
chr7_77016676_77035422_-	#N/A	#N/A	GSAP	5.6532	up	2.49907	0.0356862	0.334172	0.12622	0.273183	0.0704926	0
chr7_77200394_77221573_+	hsa_circPTPN12_004	hsa_circ_0008901	PTPN12	-2.7422	down	-1.45534	0.0235652	0.280002	0.0841466	0.409775	0.634434	0.710764
chr7_87068982_87069718_-	hsa_circABCB4_002	hsa_circ_0080960	ABCB4	25.6131	up	4.67881	0.0148496	0.268437	0.0841466	0.227653	0	0
chr7_91855033_91864237_-	hsa_circKRIT1_011	hsa_circ_0135056	KRIT1	-5.4342	down	-2.44205	0.0121226	0.252927	0	0.091061	0.28197	0.253844
chr7_92118606_92119225_-	hsa_circPEX1_023	hsa_circ_0081024	PEX1	18.3911	up	4.20093	0.0222232	0.280002	0.12622	0.091061	0	0
chr7_97820925_97823884_+	hsa_circLMTK2_015	hsa_circ_0081207	LMTK2	-4.2724	down	-2.09504	0.035177	0.334172	0.0420733	0.0455305	0.28197	0.152307
chr7_103828698_103844682_-	hsa_circORC5_002	hsa_circ_0003000	ORC5	5.0425	up	2.33415	0.0446806	0.365717	0.210366	0.136592	0.0704926	0
chr7_105204179_105206095_+	hsa_circRINT1_021	hsa_circ_0005058	RINT1	21.7979	up	4.44612	0.0178687	0.275262	0.168293	0.091061	0	0
chr7_108137027_108138021_-	hsa_circPNPLA8_007	hsa_circ_0081956	PNPLA8	18.4498	up	4.20553	0.0245082	0.280002	0.0841466	0.136592	0	0
chr7_129760588_129762042_+	hsa_circKLHDC10_012	hsa_circ_0002190	KLHDC10	2.0425	up	1.03036	0.0338314	0.331144	1.05183	1.13826	0.563941	0.507689
chr7_129841689_129842503_-	hsa_circTMEM209_011	hsa_circ_0082366	TMEM209	21.8095	up	4.44689	0.0163046	0.274218	0.168293	0.091061	0	0
chr7_140055467_140058585_-	hsa_circSLC37A3_011	hsa_circ_0004069	SLC37A3	4.1488	up	2.05271	0.0317444	0.321259	0.210366	0.318714	0	0.101538
chr7_140476711_140508795_-	hsa_circBRAF_019	hsa_circ_0007178	BRAF	-2.8553	down	-1.51365	0.0487987	0.379927	0.12622	0.091061	0.28197	0.355382
chr8_618597_624047_-	hsa_circERICH1_006	hsa_circ_0136839	ERICH1	2.5219	up	1.33453	0.0261121	0.291059	2.9872	1.41145	0.422956	1.26922
chr8_17092224_17094882_-	hsa_circCNOT7_002	hsa_circ_0008752	CNOT7	25.4594	up	4.67012	0.0135019	0.264315	0.12622	0.182122	0	0
chr8_22332466_22370945_+	hsa_circPPP3CC_004	hsa_circ_0002081	PPP3CC	22.0108	up	4.46014	0.0175881	0.275262	0.0841466	0.182122	0	0
chr8_30034641_30038146_+	hsa_circDCTN6_007	hsa_circ_0001786	DCTN6	28.6174	up	4.83882	0.00801735	0.223906	0.25244	0.091061	0	0
chr8_37727937_37735069_-	hsa_circRAB11FIP1_004	hsa_circ_0005630	RAB11FIP1	-3.4412	down	-1.78291	0.0134676	0.264315	0.12622	0.136592	0.352463	0.558458
chr8_38801306_38803739_+	hsa_circPLEKHA2_006	hsa_circ_0084021	PLEKHA2	7.0862	up	2.825	0.0274353	0.297001	0.0841466	0.409775	0	0.0507689
chr8_48612964_48614577_+	hsa_circKIAA0146_022	hsa_circ_0001799	SPIDR	-5.4583	down	-2.44846	0.0453298	0.365936	0	0.0455305	0.140985	0.152307
chr8_56863017_56866543_+	hsa_circLYN_007	hsa_circ_0006022	LYN	-4.2568	down	-2.08978	0.0128369	0.256577	0.0420733	0.182122	0.704926	0.304613
chr8_59513843_59515945_-	hsa_circNSMAF_010	hsa_circ_0084568	NSMAF	-5.4581	down	-2.44839	0.0455351	0.365936	0	0.0455305	0.140985	0.152307
chr8_67484716_67485741_-	hsa_circMYBL1_010	hsa_circ_0136924	MYBL1	6.2481	up	2.64342	0.00620146	0.204652	0.25244	0.546366	0	0.101538
chr8_71071739_71075089_-	hsa_circNCOA2_013	hsa_circ_0001810	NCOA2	3.2379	up	1.69506	0.0432744	0.365717	0.294513	0.728488	0.28197	0.0507689
chr8_81942230_81982405_-	hsa_circPAG1_003	hsa_circ_0006057	PAG1	-6.5283	down	-2.7067	0.0198309	0.275262	0.0420733	0	0.211478	0.152307
chr8_91029351_91049168_+	hsa_circDECR1_003	hsa_circ_0006056	DECR1	32.2345	up	5.01053	0.0028534	0.140159	0.25244	0.136592	0	0
chr8_92020970_92036594_-	#N/A	#N/A	TMEM55A	-5.4412	down	-2.44392	0.00964381	0.23552	0.0420733	0.0455305	0.28197	0.253844
chr8_99718694_99719539_-	hsa_circSTK3_015	hsa_circ_0004592	STK3	-2.9666	down	-1.56882	0.0217928	0.278865	0.25244	0.091061	0.493448	0.558458
chr8_100479641_100494030_+	hsa_circVPS13B_060	hsa_circ_0002565	VPS13B	25.2007	up	4.65539	0.012745	0.256577	0.210366	0.091061	0	0
chr8_101936182_101937267_-	hsa_circYWHAZ_003	hsa_circ_0005962	YWHAZ	21.8183	up	4.44746	0.0152904	0.268437	0.168293	0.091061	0	0
chr8_110422093_110432919_+	#N/A	#N/A	PKHD1L1	4.1812	up	2.06391	0.0392632	0.352721	0.168293	0.364244	0	0.101538
chr8_116599227_116635985_-	hsa_circTRPS1_003	hsa_circ_0085362	TRPS1	-10.7513	down	-3.42644	0.00127515	0.122184	0	0.0455305	0.352463	0.253844
chr8_117668094_117671219_-	hsa_circEIF3H_010	hsa_circ_0005231	EIF3H	-5.2033	down	-2.37943	0.011087	0.244171	0.0420733	0.091061	0.140985	0.558458
chr8_124089350_124113247_+	hsa_circWDR67_006	hsa_circ_0135635	TBC1D31	-4.2438	down	-2.08535	0.0354385	0.334172	0.0420733	0.0455305	0.140985	0.253844
chr8_124089350_124117704_+	hsa_circWDR67_007	hsa_circ_0085439	TBC1D31	-2.0583	down	-1.04147	0.0319105	0.321515	0.462806	0.546366	1.19837	0.91384
chr8_128902834_128903244_+	hsa_circTCONS_00015354_001	hsa_circ_0001821	PVT1	5.7901	up	2.5336	0.0456169	0.365936	0.0841466	0.318714	0	0.0507689
chr8_129021835_129022690_+	hsa_circPVT1_020	hsa_circ_0008849	not_annotated	29.1177	up	4.86383	0.00702831	0.21301	0.0841466	0.273183	0	0
chr8_131130406_131138335_-	hsa_circASAP1_082	hsa_circ_0003244	ASAP1	-5.4134	down	-2.43653	0.0110669	0.244171	0.0420733	0.0455305	0.211478	0.304613
chr8_141828375_141900868_-	hsa_circPTK2_024	hsa_circ_0005982	PTK2	28.8693	up	4.85147	0.00553289	0.192116	0.168293	0.182122	0	0
chr8_144770831_144772293_+	hsa_circZNF707_003	hsa_circ_0002535	ZNF707	5.6807	up	2.50607	0.0245451	0.280002	0.168293	0.227653	0	0.0507689
chr9_271626_289581_+	hsa_circDOCK8_002	hsa_circ_0086188	DOCK8	-3.4775	down	-1.79806	0.0165032	0.274218	0.210366	0.0455305	0.422956	0.507689
chr9_2191265_2192802_+	hsa_circSMARCA2_035	hsa_circ_0006082	SMARCA2	2.5814	up	1.36814	0.041337	0.365366	0.37866	0.86508	0.211478	0.253844
chr9_5954015_5988545_-	hsa_circKIAA2026_002	hsa_circ_0138870	KIAA2026	32.505	up	5.02259	0.00344049	0.146129	0.12622	0.273183	0	0
chr9_16435552_16437522_-	hsa_circBNC2_013	hsa_circ_0086414	BNC2	-4.2858	down	-2.09958	0.0432152	0.365717	0	0.091061	0.28197	0.152307
chr9_19360241_19361961_+	hsa_circDENND4C_055	hsa_circ_0007110	DENND4C	5.0428	up	2.33423	0.0445876	0.365717	0.210366	0.136592	0.0704926	0
chr9_37126308_37127260_+	hsa_circZCCHC7_007	hsa_circ_0138744	ZCCHC7	3.5572	up	1.83072	0.00292454	0.140159	0.841466	0.637427	0.0704926	0.304613
chr9_37126308_37147442_+	hsa_circZCCHC7_008	hsa_circ_0138745	ZCCHC7	1.7804	up	0.832241	0.0491328	0.38128	1.76708	2.0944	0.916404	1.21845
chr9_74309424_74313120_-	hsa_circTMEM2_019	hsa_circ_0003861	TMEM2	18.3971	up	4.20141	0.0208334	0.277604	0.12622	0.091061	0	0
chr9_77611362_77614786_-	hsa_circC9orf41_013	hsa_circ_0087219	C9orf41	18.3977	up	4.20146	0.0207059	0.277459	0.12622	0.091061	0	0
chr9_88233897_88248289_-	hsa_circAGTPBP1_058	hsa_circ_0001868	AGTPBP1	-1.6356	down	-0.709795	0.0243338	0.280002	2.60854	1.77569	3.59512	3.60459
chr9_88284399_88327481_-	hsa_circAGTPBP1_006	hsa_circ_0087391	AGTPBP1	-1.8567	down	-0.892707	0.0344114	0.334072	1.13598	1.09273	2.46724	1.72614
chr9_88437794_88444521_+	#N/A	#N/A	LOC389765	4.6657	up	2.22209	0.0265225	0.292732	0.420733	0.182122	0.140985	0
chr9_88923343_88924932_-	hsa_circZCCHC6_013	hsa_circ_0139259	ZCCHC6	18.3555	up	4.19814	0.036541	0.339689	0.12622	0.091061	0	0
chr9_114840817_114842445_-	hsa_circSUSD1_041	hsa_circ_0088036	SUSD1	-5.3368	down	-2.41597	0.017249	0.275262	0.0420733	0.0455305	0.140985	0.355382
chr9_125617462_125618157_-	hsa_circRC3H2_037	hsa_circ_0004688	RC3H2	32.3226	up	5.01447	0.00213483	0.128549	0.210366	0.182122	0	0
chr9_128691933_128697886_+	hsa_circPBX3_007	hsa_circ_0004804	PBX3	21.8954	up	4.45255	0.0117545	0.248516	0.12622	0.136592	0	0
chr9_130594676_130595493_+	#N/A	#N/A	not_annotated	6.8712	up	2.78056	0.0110476	0.244171	0.25244	0.227653	0.0704926	0
chr9_140622800_140657272_+	hsa_circEHMT1_020	hsa_circ_0089715	EHMT1	6.2863	up	2.65221	0.0333555	0.328514	0.336586	0.091061	0	0.0507689
chrX_17151946_17157084_+	hsa_circREPS2_027	hsa_circ_0089973	REPS2	-5.4853	down	-2.45557	0.0145737	0.268437	0	0.091061	0.352463	0.203076
chrX_40572165_40574472_-	hsa_circMED14_005	hsa_circ_0140271	MED14	3.4841	up	1.80078	0.0390943	0.352721	0.420733	0.227653	0.140985	0.0507689
chrX_51070572_51099879_-	hsa_circRP11-348F1.3_001	hsa_circ_0140370	not_annotated	3.608	up	1.85118	0.00121323	0.122184	1.47257	1.0472	0.140985	0.507689
chrX_64295353_64295792_+	hsa_circTCONS_00017187_002	hsa_circ_0002532	not_annotated	4.8266	up	2.27101	0.0150756	0.268437	0.25244	0.364244	0	0.101538
chrX_73045949_73051109_-	hsa_circTCONS_00017340_001	hsa_circ_0140538	XIST	22.0275	up	4.46124	0.0196343	0.275262	0.0841466	0.182122	0	0
chrX_73045949_73061308_-	hsa_circTCONS_00017338_001	hsa_circ_0140540	XIST	28.6111	up	4.8385	0.00832585	0.225063	0.25244	0.091061	0	0
chrX_76918870_76920267_-	hsa_circATRX_019	hsa_circ_0140612	ATRX	18.4693	up	4.20706	0.0290871	0.306443	0.0841466	0.136592	0	0
chrX_77084527_77086392_-	hsa_circMAGT1_011	hsa_circ_0140622	MAGT1	18.3893	up	4.20079	0.0226721	0.280002	0.12622	0.091061	0	0
chrX_107083899_107097934_+	hsa_circMID2_001	hsa_circ_0002153	MID2	25.3314	up	4.66285	0.0112891	0.246008	0.168293	0.136592	0	0
chrX_117718697_117724265_+	hsa_circDOCK11_022	hsa_circ_0091382	DOCK11	2.0943	up	1.06649	0.0166567	0.274218	1.76708	2.13993	1.12788	0.761533
chrX_139865339_139866824_+	hsa_circCDR1_001	hsa_circ_0001946	not_annotated	18.3711	up	4.19936	0.0285304	0.303426	0.12622	0.091061	0	0
chrX_147743428_147744289_+	hsa_circAFF2_005	hsa_circ_0001947	AFF2	-1.857	down	-0.892957	0.0336961	0.331144	1.64086	2.0944	4.7935	2.23383
chrX_149867667_149887172_+	#N/A	#N/A	MTMR1	32.3567	up	5.01599	0.00193043	0.125795	0.168293	0.227653	0	0
chrX_149962163_149984551_-	hsa_circCD99L2_007	hsa_circ_0001948	CD99L2	3.5265	up	1.81825	0.0165082	0.274218	0.589026	0.455305	0	0.253844
chrY_1354670_1359402_+	#N/A	#N/A	CSF2RA	-2.7471	down	-1.45793	0.00703017	0.21301	0.25244	0.318714	0.704926	0.863071
chrY_2821949_2829687_+	hsa_circZFY_001	hsa_circ_0001953	ZFY	-334.947	down	-8.38779	4.44912e-17	1.2977e-13	0	0	2.11478	2.08152
chrY_2829114_2829687_+	hsa_circZFY_003	hsa_circ_0007907	ZFY	-37.8028	down	-5.24042	0.000905476	0.107684	0	0	0.140985	0.304613
chrY_15021270_15024974_+	hsa_circDDX3Y_002	hsa_circ_0008297	DDX3Y	-69.921	down	-6.12765	9.84854e-06	0.00292809	0	0	0.28197	0.558458
chrY_15447442_15448215_-	hsa_circUTY_009	hsa_circ_0140758	UTY	-33.3969	down	-5.06164	0.00163901	0.122184	0	0	0.140985	0.253844
chrY_21749095_21749393_+	hsa_circTXLNG2P_002	hsa_circ_0009024	TXLNGY	-276.187	down	-8.1095	1.28613e-15	2.03937e-12	0	0	1.9033	1.57384
chrY_21749095_21752658_+	hsa_circTXLNG2P_003	hsa_circ_0140779	TXLNGY	-33.9192	down	-5.08403	0.000999563	0.113212	0	0	0.211478	0.203076
